# Supplementary material for: Ursolic acid targets secreted phosphoprotein 1 to regulate Th17 cells against metabolic dysfunction-associated steatotic liver disease
Source: PubMed Central journal article supplement — Clin Mol Hepatol. 2024 Apr 16;30(3):449–67. doi: 10.3350/cmh.2024.0047 (PMC11261229; doi:10.3350/cmh.2024.0047), 2024-04-16
Supplement: cmh-2024-0047-Supplementary-Fig-1.pdf [file cmh-2024-0047-Supplementary-Fig-1.pdf]

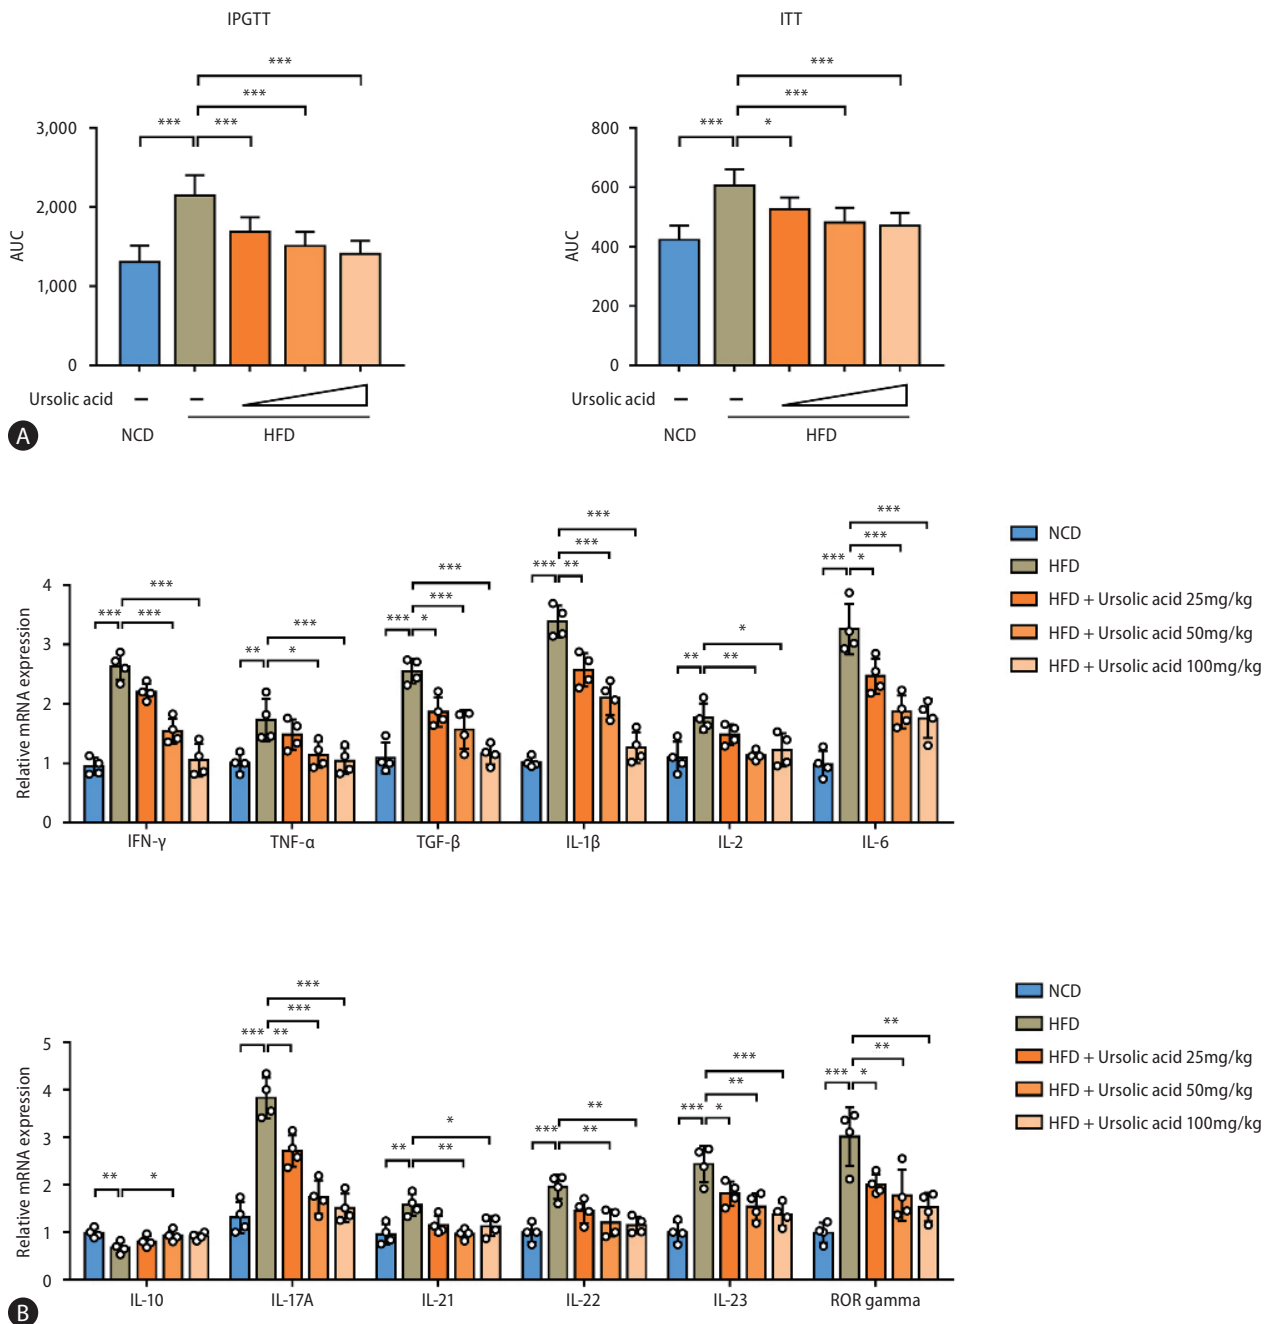

**Supplementary Figure 1.** Ursolic acid provides therapeutic effects on body weight gain, insulin resistance, and inflammatory response in HFD-fed mice. (A) The values of area under the curve for both IPGTT and ITT were calculated using the trapezoidal rule to quantify the overall glucose response and insulin sensitivity, respectively. (B) The assessments of gene expression levels of inflammatory cytokines in liver tissues accentuated the remarkable anti-inflammatory attribute of ursolic acid. HFD, high-fat diets; IPGTT, intraperitoneal glucose tolerance tests; ITT, insulin tolerance tests; AUC, area under the curve; NCD, normal control diets; SD, standard deviation. Data are represented as mean $\pm$ SD. n=4-8. \* $P$ <0.05, \*\* $P$ <0.01, \*\*\* $P$ <0.001.
