# Supplementary material for: Ursolic acid targets secreted phosphoprotein 1 to regulate Th17 cells against metabolic dysfunction-associated steatotic liver disease
Source: PubMed Central journal article supplement — Clin Mol Hepatol. 2024 Apr 16;30(3):449–67. doi: 10.3350/cmh.2024.0047 (PMC11261229; doi:10.3350/cmh.2024.0047), 2024-04-16
Supplement: cmh-2024-0047-Supplementary-Fig-2.pdf [file cmh-2024-0047-Supplementary-Fig-2.pdf]

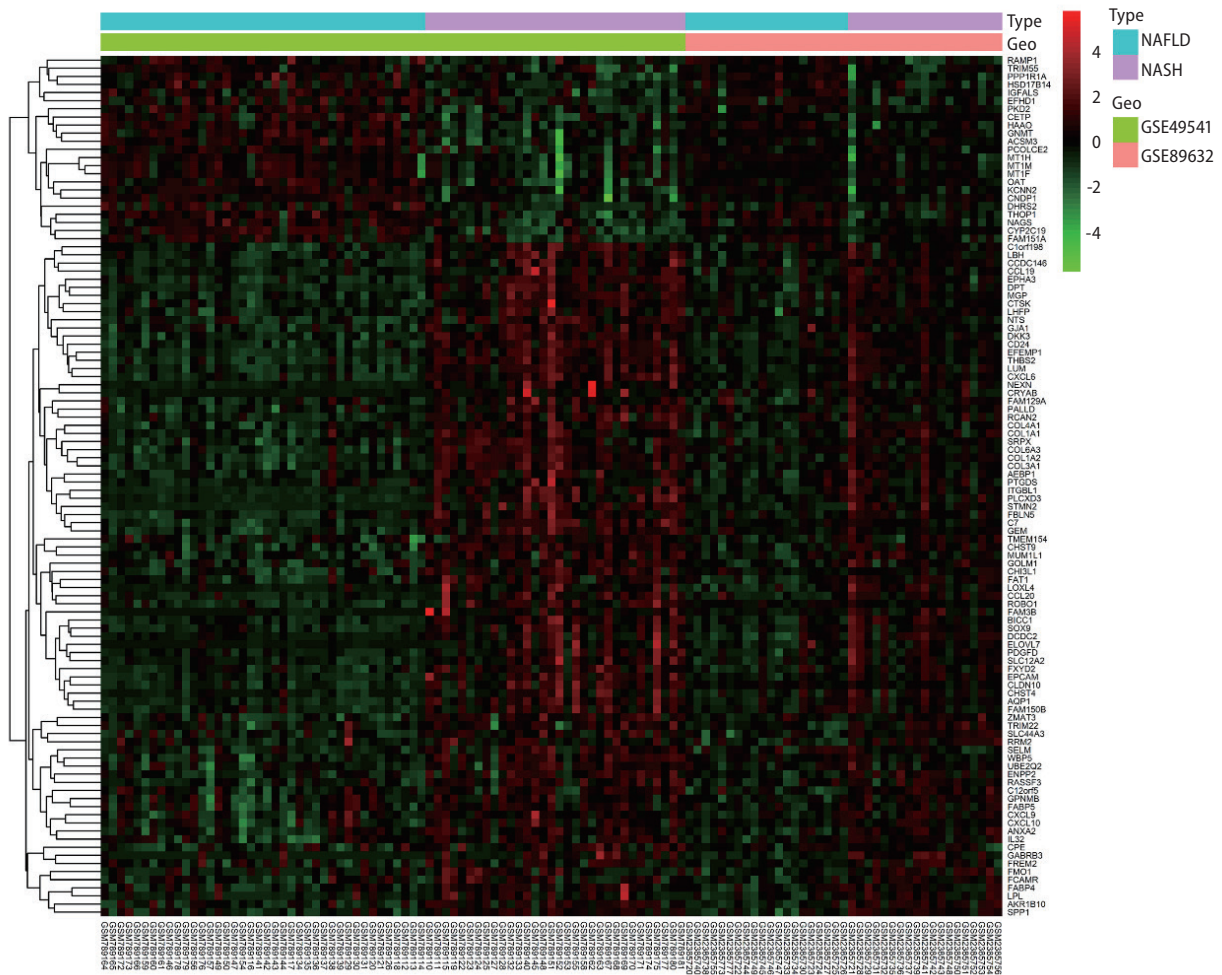

**Supplementary Figure 2.** Bioinformatic analysis. A heatmap for 106 DEGs was drawn for two microarrays, specifically GSE49541 and GSE89632, including 40 and 20 samples of MASLD, as well as 32 and 19 samples of MASH, respectively. DEGs, differentially expressed genes; MASLD, metabolic dysfunction-associated steatotic liver disease; MASH, metabolic dysfunction-associated steatohepatitis.
