# Supplementary material for: Ursolic acid targets secreted phosphoprotein 1 to regulate Th17 cells against metabolic dysfunction-associated steatotic liver disease
Source: PubMed Central journal article supplement — Clin Mol Hepatol. 2024 Apr 16;30(3):449–67. doi: 10.3350/cmh.2024.0047 (PMC11261229; doi:10.3350/cmh.2024.0047), 2024-04-16
Supplement: cmh-2024-0047-Supplementary-Fig-5.pdf [file cmh-2024-0047-Supplementary-Fig-5.pdf]

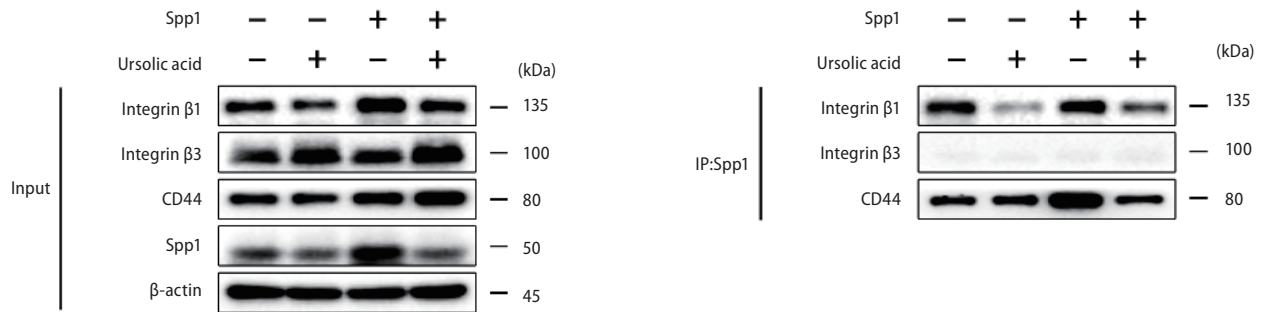

**Supplementary Figure 5.** Co-immunoprecipitation experiments. The outcomes demonstrated strong interactions between SPP1 and both ITGB1 and CD44. SPP1, secreted phosphoprotein 1; ITGB1, integrin  $\beta$ 1; CD44A, CD44 antagonists.
