# Supplementary material for: Ursolic acid targets secreted phosphoprotein 1 to regulate Th17 cells against metabolic dysfunction-associated steatotic liver disease
Source: PubMed Central journal article supplement — Clin Mol Hepatol. 2024 Apr 16;30(3):449–67. doi: 10.3350/cmh.2024.0047 (PMC11261229; doi:10.3350/cmh.2024.0047), 2024-04-16
Supplement: cmh-2024-0047-Supplementary-Fig-6.pdf [file cmh-2024-0047-Supplementary-Fig-6.pdf]

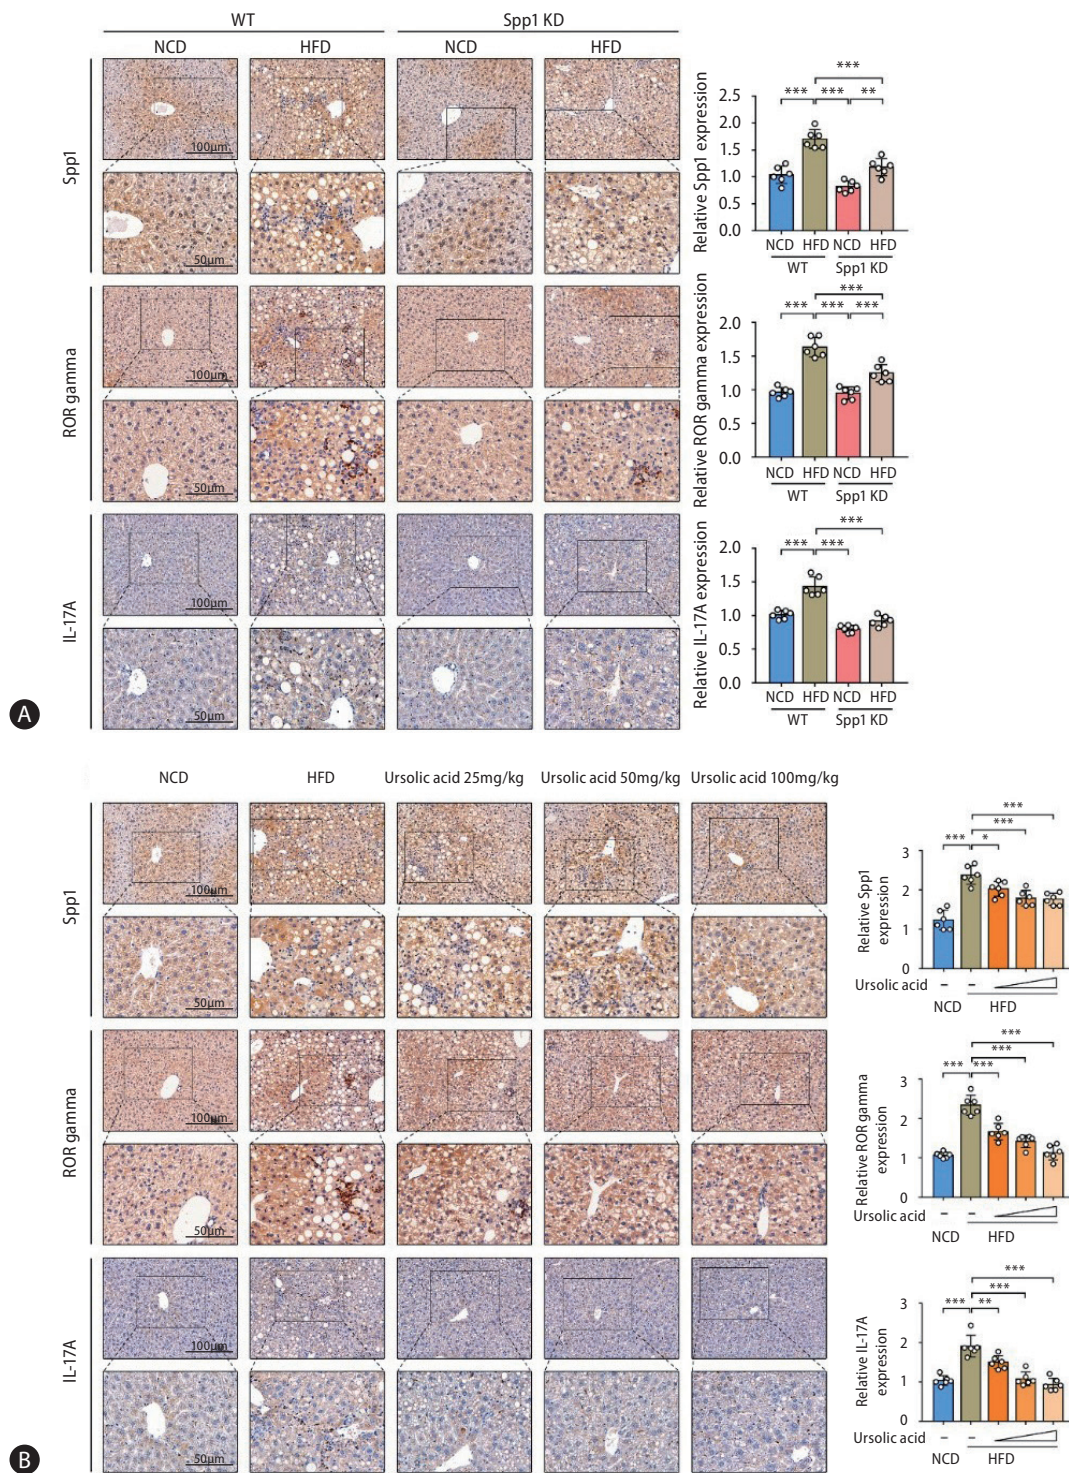

**Supplementary Figure 6.** Ursolic acid modulates SPP1 expression and Th17 cell proportion to ameliorate MASLD. (A) The liver tissue sections were derived from the experiments of SPP1 KD, and the results of immunohistochemical staining revealed that SPP1 KD inhibited the protein levels of SPP1, ROR gamma, and IL-17A in liver tissues. (B) The liver tissue sections were derived from the first part of experiments, those were fed with HFD and different concentrations of ursolic acid. The results of immunohistochemical staining displayed that the intervention of ursolic acid suppressed the protein levels of SPP1, ROR gamma, and IL-17A in liver tissues. Data are represented as mean±SD. n=6. \* $P<0.05$ , \*\* $P<0.01$ , \*\*\* $P<0.001$ . SPP1, secreted phosphoprotein 1; MASLD, metabolic dysfunction-associated steatotic liver disease; KD, knockdown; HFD, high-fat diets; NCD, normal control diets; SD, standard deviation.
