# Supplementary material for: Ursolic acid targets secreted phosphoprotein 1 to regulate Th17 cells against metabolic dysfunction-associated steatotic liver disease
Source: PubMed Central journal article supplement — Clin Mol Hepatol. 2024 Apr 16;30(3):449–67. doi: 10.3350/cmh.2024.0047 (PMC11261229; doi:10.3350/cmh.2024.0047), 2024-04-16
Supplement: cmh-2024-0047-Supplementary-Table-1.pdf [file cmh-2024-0047-Supplementary-Table-1.pdf]

**Supplementary Table 1.** List of primer sequences used in this study

| Gene name     | Sequence (5'-3') forward | Sequence (5'-3') reverse |
|---------------|--------------------------|--------------------------|
| IFN- $\gamma$ | CGGCACAGTCATTGAAAGCC     | TGAGCTCATTGAATGCTTGG     |
| TNF- $\alpha$ | CCCTCACACTCAGATCATCTT    | GCTACGACGTGGGTACAG       |
| TGF- $\beta$  | GTGACGGAGGTCACAGGACT     | CGTCAAAGACAGCCACTCA      |
| IL-1 $\beta$  | AGTTGACGGACCCAAAAG       | AGCTGGATGCTCTCATCAGG     |
| IL-6          | CCAGGTAGCTATGGTACTCCA    | GCTACCAAAGTGGCTATAATC    |
| IL-10         | CAGAGCCACATGCTCCTAGA     | TGTCCAGCTGGTCCTTTGTT     |
| IL-17A        | CGCAATGAAGACCCTGA        | TCTCGACCCTGAAAGTGAA      |
| IL-21         | AAGGAGGAGGCTGAGAGATG     | GGTCCTTGAGGAGCAGGAAT     |
| IL-22         | GCAGCAGGATCAGGAAGAAC     | AGGCAGCTGGAAGACATCAA     |
| IL-23         | AATAATGTGCCCGTATCCAGT    | GCTCCCCTTTGAAGATGTCAG    |
| Beta-actin    | CTCTCCCTCAGCCATC         | ACGCACGATTTCCCTCTC       |
