# Supplementary material for: Ursolic acid targets secreted phosphoprotein 1 to regulate Th17 cells against metabolic dysfunction-associated steatotic liver disease
Source: PubMed Central journal article supplement — Clin Mol Hepatol. 2024 Apr 16;30(3):449–67. doi: 10.3350/cmh.2024.0047 (PMC11261229; doi:10.3350/cmh.2024.0047), 2024-04-16
Supplement: cmh-2024-0047-Supplementary-Table-2.pdf [file cmh-2024-0047-Supplementary-Table-2.pdf]

**Supplementary Table 2.** Differentially expressed genes for MASLD

| ID       | logFC    | AveExpr  | t        | P-value  | adj.P.Val | B        |
|----------|----------|----------|----------|----------|-----------|----------|
| COL1A2   | 1.028978 | 7.73642  | 10.6789  | 9.57E-19 | 9.63E-15  | 31.66697 |
| EFEMP1   | 1.207598 | 6.114424 | 10.6316  | 1.23E-18 | 9.63E-15  | 31.42866 |
| THBS2    | 1.551017 | 7.57759  | 9.795512 | 1.05E-16 | 5.47E-13  | 27.21029 |
| CD24     | 1.458272 | 8.426423 | 9.702115 | 1.72E-16 | 6.73E-13  | 26.7391  |
| LUM      | 0.834473 | 9.252626 | 9.64065  | 2.38E-16 | 7.46E-13  | 26.4291  |
| DKK3     | 0.510639 | 5.671973 | 9.171627 | 2.85E-15 | 7.44E-12  | 24.06762 |
| EPCAM    | 1.67433  | 7.043575 | 9.065563 | 5.00E-15 | 1.12E-11  | 23.535   |
| STMN2    | 1.127385 | 5.404498 | 9.000677 | 7.03E-15 | 1.38E-11  | 23.2095  |
| BICC1    | 0.774994 | 5.557225 | 8.741415 | 2.75E-14 | 4.78E-11  | 21.91188 |
| AQP1     | 1.06067  | 6.097355 | 8.634417 | 4.81E-14 | 7.53E-11  | 21.37795 |
| CXCL6    | 1.582868 | 6.532468 | 8.592836 | 5.98E-14 | 7.99E-11  | 21.17074 |
| DPT      | 0.95981  | 6.920224 | 8.588412 | 6.12E-14 | 7.99E-11  | 21.1487  |
| C7       | 0.726013 | 9.19685  | 8.415492 | 1.51E-13 | 1.82E-10  | 20.28893 |
| CHST9    | 1.156534 | 7.500084 | 8.341456 | 2.22E-13 | 2.48E-10  | 19.9218  |
| EPHA3    | 0.518485 | 5.666194 | 8.234338 | 3.87E-13 | 4.04E-10  | 19.39177 |
| GEM      | 1.086766 | 6.552004 | 8.11188  | 7.30E-13 | 7.14E-10  | 18.78762 |
| ITGBL1   | 0.868695 | 5.284018 | 8.089486 | 8.20E-13 | 7.54E-10  | 18.67735 |
| COL3A1   | 0.72769  | 9.836852 | 7.920498 | 1.96E-12 | 1.70E-09  | 17.84759 |
| THOP1    | -0.90958 | 8.45567  | -7.66691 | 7.17E-12 | 5.61E-09  | 16.61082 |
| CCDC146  | 0.741866 | 5.984972 | 7.637269 | 8.34E-12 | 6.21E-09  | 16.46696 |
| COL4A1   | 0.552657 | 7.895575 | 7.511141 | 1.58E-11 | 1.12E-08  | 15.85666 |
| MGP      | 0.675925 | 7.0862   | 7.408781 | 2.66E-11 | 1.73E-08  | 15.36362 |
| FBLN5    | 0.723855 | 6.639448 | 7.377293 | 3.11E-11 | 1.95E-08  | 15.21237 |
| PLCXD3   | 0.606717 | 6.012561 | 7.337645 | 3.80E-11 | 2.29E-08  | 15.02221 |
| CCL20    | 1.212269 | 6.320883 | 7.204508 | 7.41E-11 | 4.14E-08  | 14.38614 |
| SRPX     | 0.612212 | 9.020571 | 7.178914 | 8.42E-11 | 4.54E-08  | 14.2643  |
| SOX9     | 0.995237 | 5.970502 | 7.042366 | 1.66E-10 | 8.67E-08  | 13.61687 |
| PDGFD    | 0.577524 | 6.067427 | 6.970873 | 2.37E-10 | 1.20E-07  | 13.27967 |
| FXYD2    | 0.691151 | 6.170858 | 6.889482 | 3.54E-10 | 1.73E-07  | 12.89733 |
| COL1A1   | 0.733075 | 6.61785  | 6.835738 | 4.61E-10 | 2.18E-07  | 12.64579 |
| AKR1B10  | 2.338773 | 7.891528 | 6.692599 | 9.28E-10 | 4.27E-07  | 11.97964 |
| CLDN10   | 0.828843 | 6.028437 | 6.616431 | 1.34E-09 | 5.68E-07  | 11.62747 |
| FAT1     | 0.803975 | 8.878406 | 6.510995 | 2.24E-09 | 8.97E-07  | 11.14276 |
| C1orf198 | 0.550955 | 7.443004 | 6.461389 | 2.84E-09 | 1.08E-06  | 10.91586 |
| DCDC2    | 0.766965 | 5.699392 | 6.456584 | 2.91E-09 | 1.08E-06  | 10.89392 |
| SLC12A2  | 0.500682 | 7.028228 | 6.453549 | 2.95E-09 | 1.08E-06  | 10.88007 |
| COL6A3   | 0.637115 | 8.736644 | 6.451844 | 2.97E-09 | 1.08E-06  | 10.87229 |
| PALLD    | 0.509038 | 7.743535 | 6.434909 | 3.22E-09 | 1.15E-06  | 10.79505 |
| ENPP2    | 1.136569 | 8.979792 | 6.308888 | 5.89E-09 | 1.96E-06  | 10.2231  |
| LBH      | 0.516015 | 6.82141  | 6.253147 | 7.67E-09 | 2.31E-06  | 9.971754 |
| CYP2C19  | -1.47607 | 9.620076 | -6.25271 | 7.68E-09 | 2.31E-06  | 9.969779 |

**Supplementary Table 2.** Continued

| ID       | logFC    | AveExpr  | t        | P-value  | adj.P.Val | B        |
|----------|----------|----------|----------|----------|-----------|----------|
| CTSK     | 0.618101 | 7.441159 | 6.238099 | 8.23E-09 | 2.43E-06  | 9.904074 |
| LHFP     | 0.539615 | 7.978782 | 6.154713 | 1.22E-08 | 3.26E-06  | 9.530424 |
| MUM1L1   | 0.77784  | 6.511646 | 6.153758 | 1.23E-08 | 3.26E-06  | 9.526159 |
| PPP1R1A  | -0.56866 | 9.847101 | -6.13931 | 1.31E-08 | 3.38E-06  | 9.461675 |
| SPP1     | 0.959716 | 7.475876 | 6.119029 | 1.44E-08 | 3.58E-06  | 9.371249 |
| HAAO     | -0.61796 | 8.376027 | -6.06669 | 1.84E-08 | 4.44E-06  | 9.138596 |
| RASSF3   | 0.629221 | 7.153554 | 6.013674 | 2.36E-08 | 5.35E-06  | 8.903906 |
| NTS      | 1.019953 | 6.031607 | 5.97478  | 2.83E-08 | 6.15E-06  | 8.732384 |
| ROBO1    | 0.650787 | 6.918553 | 5.918097 | 3.68E-08 | 7.57E-06  | 8.483402 |
| ZMAT3    | 0.521642 | 7.869262 | 5.905208 | 3.90E-08 | 7.83E-06  | 8.426954 |
| KCNN2    | -0.76481 | 10.19301 | -5.8787  | 4.41E-08 | 8.74E-06  | 8.311066 |
| GABRB3   | 0.611834 | 5.105239 | 5.842305 | 5.21E-08 | 1.01E-05  | 8.152362 |
| AEBP1    | 0.644648 | 7.396521 | 5.787159 | 6.71E-08 | 1.25E-05  | 7.91288  |
| RCAN2    | 0.731019 | 6.37841  | 5.726511 | 8.85E-08 | 1.61E-05  | 7.650869 |
| CHI3L1   | 0.998165 | 6.465154 | 5.617075 | 1.45E-07 | 2.38E-05  | 7.181814 |
| FAM129A  | 0.512572 | 6.254471 | 5.609416 | 1.50E-07 | 2.43E-05  | 7.149168 |
| NAGS     | -0.51433 | 7.6916   | -5.60324 | 1.55E-07 | 2.47E-05  | 7.12285  |
| LOXL4    | 0.533756 | 6.034231 | 5.551678 | 1.95E-07 | 2.99E-05  | 6.903858 |
| RAMP1    | -0.6762  | 8.766583 | -5.54564 | 2.00E-07 | 3.04E-05  | 6.878304 |
| GOLM1    | 0.510502 | 6.030732 | 5.513657 | 2.31E-07 | 3.40E-05  | 6.74308  |
| ANXA2    | 0.515888 | 8.865514 | 5.449683 | 3.07E-07 | 4.18E-05  | 6.473953 |
| WBP5     | 0.559342 | 9.683361 | 5.445114 | 3.13E-07 | 4.23E-05  | 6.454798 |
| HSD17B14 | -0.59632 | 6.147015 | -5.29537 | 6.05E-07 | 7.40E-05  | 5.832163 |
| CCL19    | 1.021021 | 6.877516 | 5.24548  | 7.52E-07 | 8.99E-05  | 5.626953 |
| DHRS2    | -1.0157  | 6.50465  | -5.23898 | 7.74E-07 | 9.11E-05  | 5.600297 |
| NEXN     | 0.506113 | 5.424502 | 5.186094 | 9.73E-07 | 0.000108  | 5.384193 |
| GNMT     | -0.91033 | 10.71144 | -5.14268 | 1.17E-06 | 0.000125  | 5.207767 |
| IGFALS   | -0.62169 | 8.598277 | -5.08801 | 1.48E-06 | 0.000148  | 4.986867 |
| PKD2     | -0.65525 | 9.565386 | -5.06239 | 1.65E-06 | 0.000161  | 4.883871 |
| FAM150B  | 0.659355 | 5.578773 | 5.056269 | 1.70E-06 | 0.000163  | 4.859286 |
| GJA1     | 0.54167  | 8.1901   | 4.949452 | 2.67E-06 | 0.000227  | 4.433551 |
| CHST4    | 0.590496 | 6.070469 | 4.898597 | 3.30E-06 | 0.000274  | 4.23286  |
| FAM3B    | 0.657322 | 5.2886   | 4.837275 | 4.27E-06 | 0.000329  | 3.992612 |
| ACSM3    | -0.54418 | 8.628012 | -4.83334 | 4.34E-06 | 0.000331  | 3.977266 |
| TRIM22   | 0.535453 | 9.856706 | 4.778115 | 5.45E-06 | 0.000395  | 3.762681 |
| OAT      | -0.69333 | 11.56744 | -4.77459 | 5.53E-06 | 0.000396  | 3.749033 |
| MT1M     | -1.051   | 10.94309 | -4.72933 | 6.66E-06 | 0.000461  | 3.574467 |
| PCOLCE2  | -0.60668 | 9.407697 | -4.63065 | 9.95E-06 | 0.000626  | 3.197601 |
| SLC44A3  | 0.653497 | 6.915839 | 4.629478 | 1.00E-05 | 0.000626  | 3.193153 |
| IL32     | 0.761777 | 9.828125 | 4.508919 | 1.62E-05 | 0.000908  | 2.740052 |

**Supplementary Table 2.** Continued

| ID      | logFC    | AveExpr  | t        | P-value  | adj.P.Val | B        |
|---------|----------|----------|----------|----------|-----------|----------|
| ELOVL7  | 0.506556 | 5.1777   | 4.459269 | 1.98E-05 | 0.001048  | 2.555814 |
| CXCL9   | 0.89153  | 7.891012 | 4.452874 | 2.03E-05 | 0.001068  | 2.532184 |
| MT1H    | -0.60866 | 13.0193  | -4.42665 | 2.25E-05 | 0.001147  | 2.435524 |
| FMO1    | 0.810162 | 6.590128 | 4.397283 | 2.52E-05 | 0.001257  | 2.327769 |
| C12orf5 | 0.583613 | 7.482555 | 4.344551 | 3.10E-05 | 0.001465  | 2.135519 |
| FABP4   | 0.812801 | 6.657287 | 4.343486 | 3.11E-05 | 0.001466  | 2.131654 |
| PTGDS   | 0.654656 | 6.962299 | 4.314068 | 3.49E-05 | 0.001629  | 2.025127 |
| FAM151A | -0.95573 | 6.987282 | -4.29685 | 3.73E-05 | 0.001731  | 1.963024 |
| CNDP1   | -0.65219 | 10.95904 | -4.29437 | 3.76E-05 | 0.001733  | 1.954087 |
| EFHD1   | -0.8238  | 7.636143 | -4.19622 | 5.48E-05 | 0.002307  | 1.60352  |
| RRM2    | 0.665087 | 6.463334 | 4.1896   | 5.62E-05 | 0.002344  | 1.580096 |
| LPL     | 0.700866 | 5.58635  | 4.1549   | 6.42E-05 | 0.002601  | 1.457693 |
| CXCL10  | 0.757536 | 9.747718 | 4.095819 | 8.01E-05 | 0.003029  | 1.250982 |
| MT1F    | -0.56359 | 12.96868 | -4.02775 | 0.000103 | 0.003724  | 1.015506 |
| UBE2Q2  | 0.510556 | 8.733244 | 3.97159  | 0.000127 | 0.00439   | 0.823431 |
| FCAMR   | 0.66587  | 7.371018 | 3.921202 | 0.000153 | 0.004992  | 0.652803 |
| TRIM55  | -0.54641 | 7.580682 | -3.90215 | 0.000164 | 0.005219  | 0.588724 |
| FREM2   | 0.777198 | 7.34503  | 3.524269 | 0.000618 | 0.014048  | -0.63273 |
| TMEM154 | 0.587643 | 9.478369 | 3.467012 | 0.000749 | 0.016398  | -0.80928 |
| GPNMB   | 0.542197 | 8.20525  | 3.429655 | 0.000849 | 0.018073  | -0.92323 |
| FABP5   | 0.711738 | 8.42374  | 3.153807 | 0.002073 | 0.034726  | -1.73345 |
| SELM    | 0.521579 | 7.07857  | 3.149358 | 0.002102 | 0.035027  | -1.74606 |
| CRYAB   | 0.531648 | 6.032765 | 3.128015 | 0.002247 | 0.036705  | -1.80634 |
| CETP    | -0.54243 | 8.526739 | -3.08835 | 0.002542 | 0.040142  | -1.91748 |
| CPE     | 0.553213 | 8.13864  | 3.044305 | 0.002912 | 0.044363  | -2.03947 |
