# Supplementary material for: Ursolic acid targets secreted phosphoprotein 1 to regulate Th17 cells against metabolic dysfunction-associated steatotic liver disease
Source: PubMed Central journal article supplement — Clin Mol Hepatol. 2024 Apr 16;30(3):449–67. doi: 10.3350/cmh.2024.0047 (PMC11261229; doi:10.3350/cmh.2024.0047), 2024-04-16
Supplement: cmh-2024-0047-Supplementary-Table-3.pdf [file cmh-2024-0047-Supplementary-Table-3.pdf]

Supplementary Table 3. Continued

| Block | Column | Row | Name    | F635             |                |              |                  |                |              |
|-------|--------|-----|---------|------------------|----------------|--------------|------------------|----------------|--------------|------------------|----------------|--------------|------------------|----------------|--------------|------------------|----------------|--------------|------------------|----------------|--------------|------------------|----------------|--------------|
|       |        |     |         | Median_ D-Biotin | Mean_ D-Biotin | SD_ D-Biotin | Median_ D-Biotin | Mean_ D-Biotin | SD_ D-Biotin | Median_ D-Biotin | Mean_ D-Biotin | SD_ D-Biotin | Median_ D-Biotin | Mean_ D-Biotin | SD_ D-Biotin | Median_ D-Biotin | Mean_ D-Biotin | SD_ D-Biotin | Median_ D-Biotin | Mean_ D-Biotin | SD_ D-Biotin | Median_ D-Biotin | Mean_ D-Biotin | SD_ D-Biotin |
| 13    | 5      | 83  | NAT16   | 579              | 590            | 415          | 423              | 100            | 164          | 1.67             | 1.40           | 0.52         | 3006             | 2925           | 263          | 271              | 76             | 2743         | 34921            | 11.43          | 4.00         | 1.36             | 10.98          | 8.07         |
| 14    | 21     | 79  | FKBP4   | 434              | 438            | 343          | 364              | 252            | 91           | 0.294            | 1.27           | 0.31         | 2736             | 2613           | 280          | 285              | 86             | 2456         | 2707             | 9.77           | 3.30         | 1.24             | 9.74           | 7.82         |
| 3     | 3      | 55  | SEC13   | 717              | 739            | 344          | 355              | 111            | 373          | 3.459            | 2.08           | 1.63         | 4334             | 3860           | 270          | 342              | 242            | 4064         | 14.537           | 16.05          | 5.96         | 2.10             | 16.53          | 7.88         |
| 16    | 11     | 83  | CINP    | 274              | 279            | 263          | 267              | 84             | 11           | 0.143            | 1.04           | -0.05        | 2376             | 2406           | 233          | 240              | 77             | 2143         | 28.13            | 10.20          | 3.88         | 1.08             | 10.28          | 9.54         |
| 2     | 19     | 55  | IGL@    | 345              | 357            | 317          | 325              | 88             | 28           | 0.364            | 1.09           | 0.02         | 2627             | 2497           | 235          | 244              | 88             | 2392         | 25.602           | 11.18          | 3.89         | 1.12             | 11.44          | 10.19        |
| 15    | 20     | 77  | PKIA    | 331              | 337            | 295          | 303              | 83             | 36           | 0.41             | 1.12           | 0.08         | 2211             | 2065           | 246          | 252              | 73             | 1965         | 24.836           | 8.99           | 2.96         | 1.09             | 8.98           | 8.24         |
| 15    | 15     | 83  | AC01    | 426              | 429            | 298          | 301              | 82             | 128          | 1.561            | 1.43           | 0.57         | 2730             | 2416           | 263          | 275              | 90             | 2467         | 23.789           | 10.38          | 3.55         | 1.41             | 10.54          | 7.47         |
| 10    | 5      | 87  | ANXA6   | 413              | 425            | 338          | 345              | 90             | 75           | 0.889            | 1.22           | 0.24         | 3041             | 2788           | 281          | 478              | 583            | 2760         | 3.962            | 10.82          | 3.74         | 1.18             | 11.02          | 9.37         |
| 13    | 12     | 79  | NME1    | 480              | 483            | 406          | 408              | 98             | 74           | 0.765            | 1.18           | 0.17         | 2936             | 2635           | 268          | 279              | 111            | 2668         | 21.225           | 10.96          | 3.80         | 1.17             | 10.99          | 9.42         |
| 10    | 15     | 89  | GPD1    | 430              | 439            | 331          | 338              | 84             | 99           | 1.202            | 1.30           | 0.36         | 7433             | 6578           | 290          | 482              | 350            | 7143         | 17.56            | 25.63          | 10.02        | 1.29             | 26.06          | 20.20        |
| 19    | 5      | 15  | PCBD1   | 350              | 354            | 334          | 340              | 88             | 16           | 0.159            | 1.05           | -0.04        | 3083             | 3009           | 271          | 273              | 77             | 2812         | 35.532           | 11.38          | 3.98         | 1.06             | 11.33          | 10.67        |
| 16    | 14     | 15  | RNPEP   | 305              | 316            | 246          | 249              | 75             | 59           | 0.893            | 1.24           | 0.27         | 4332             | 3743           | 244          | 297              | 186            | 4088         | 18.527           | 17.75          | 6.68         | 1.27             | 17.16          | 13.48        |
| 1     | 6      | 63  | PAPSS1  | 337              | 339            | 284          | 292              | 83             | 53           | 0.566            | 1.19           | 0.18         | 2545             | 2344           | 241          | 250              | 102            | 2304         | 20.529           | 10.56          | 3.63         | 1.15             | 10.61          | 9.25         |
| 2     | 16     | 65  | SHCBP1  | 508              | 509            | 341          | 347              | 92             | 167          | 1.761            | 1.49           | 0.67         | 5517             | 5134           | 274          | 695              | 865            | 5243         | 5.132            | 20.14          | 7.69         | 1.52             | 20.89          | 13.70        |
| 9     | 15     | 85  | FMO3    | 410              | 421            | 349          | 355              | 93             | 61           | 0.71             | 1.17           | 0.16         | 3084             | 3024           | 245          | 253              | 82             | 2839         | 33.793           | 12.59          | 4.49         | 1.17             | 12.09          | 10.31        |
| 13    | 7      | 67  | SAMHD1  | 516              | 535            | 403          | 412              | 128            | 113          | 0.961            | 1.28           | 0.33         | 3686             | 3246           | 268          | 277              | 84             | 3418         | 35.345           | 13.75          | 4.98         | 1.31             | 13.79          | 10.49        |
| 14    | 16     | 71  | CASQ2   | 486              | 491            | 338          | 341              | 91             | 148          | 1.648            | 1.44           | 0.59         | 2519             | 2305           | 272          | 277              | 85             | 2247         | 26.212           | 9.26           | 3.08         | 1.43             | 9.27           | 6.46         |
| 16    | 19     | 9   | DNAM4A  | 330              | 338            | 233          | 240              | 73             | 97           | 1.342            | 1.42           | 0.55         | 2203             | 2134           | 214          | 222              | 72             | 1989         | 26.556           | 10.29          | 3.52         | 1.42             | 10.21          | 7.17         |
| 16    | 1      | 11  | GRHR    | 339              | 352            | 263          | 268              | 79             | 76           | 1.063            | 1.29           | 0.35         | 3905             | 3586           | 243          | 251              | 88             | 3662         | 37.898           | 16.07          | 5.96         | 1.27             | 15.70          | 12.33        |
| 15    | 32     | 79  | BCCIP   | 364              | 370            | 277          | 281              | 80             | 87           | 1.113            | 1.31           | 0.39         | 3629             | 3449           | 252          | 277              | 130            | 3377         | 24.4             | 14.40          | 5.26         | 1.31             | 14.15          | 10.76        |
| 15    | 22     | 13  | UBE2C   | 311              | 317            | 290          | 293              | 82             | 21           | 0.293            | 1.07           | 0.00         | 2261             | 2181           | 246          | 254              | 84             | 2015         | 22.94            | 9.19           | 3.05         | 1.09             | 9.06           | 8.34         |
| 12    | 14     | 89  | ADHS    | 381              | 389            | 244          | 249              | 72             | 137          | 1.944            | 1.56           | 0.78         | 4498             | 3968           | 246          | 261              | 98             | 4252         | 37.827           | 18.28          | 6.90         | 1.56             | 17.30          | 11.09        |
| 16    | 14     | 79  | FCGR3A  | 363              | 375            | 252          | 257              | 75             | 111          | 1.573            | 1.44           | 0.59         | 2141             | 2180           | 227          | 236              | 76             | 1914         | 25.579           | 9.43           | 3.15         | 1.46             | 9.22           | 6.31         |
| 18    | 2      | 13  | PDCD5   | 402              | 408            | 391          | 395              | 92             | 11           | 0.141            | 1.03           | -0.07        | 2707             | 2408           | 273          | 279              | 81             | 2434         | 26.284           | 9.92           | 3.36         | 1.04             | 9.69           | 9.34         |
| 16    | 20     | 85  | AKR1A1  | 314              | 317            | 264          | 267              | 78             | 50           | 0.641            | 1.19           | 0.19         | 2267             | 2058           | 236          | 244              | 78             | 2031         | 23.256           | 9.61           | 3.23         | 1.20             | 9.42           | 7.84         |
| 1     | 30     | 73  | AKR1C4  | 318              | 323            | 274          | 282              | 81             | 44           | 0.506            | 1.16           | 0.14         | 3230             | 2990           | 239          | 244              | 76             | 2991         | 36.132           | 13.51          | 4.88         | 1.13             | 13.35          | 11.82        |
| 1     | 28     | 73  | RABGGTB | 285              | 289            | 286          | 290              | 78             | -1           | -0.013           | 1.00           | -0.12        | 2734             | 2552           | 229          | 235              | 70             | 2505         | 33.1             | 11.94          | 4.21         | 1.01             | 11.79          | 11.70        |
| 3     | 3      | 83  | CC77    | 398              | 409            | 317          | 321              | 84             | 81           | 1.048            | 1.26           | 0.29         | 3384             | 3058           | 235          | 241              | 75             | 3149         | 37.56            | 14.40          | 5.26         | 1.21             | 14.24          | 11.77        |
| 1     | 15     | 81  | ISOC2   | 314              | 314            | 275          | 283              | 80             | 39           | 0.388            | 1.14           | 0.11         | 2530             | 2481           | 230          | 236              | 73             | 2300         | 30.753           | 11.00          | 3.82         | 1.17             | 11.04          | 9.44         |
| 16    | 20     | 87  | ICTD14  | 460              | 466            | 280          | 288              | 99             | 180          | 1.798            | 1.64           | 0.92         | 3842             | 3472           | 232          | 274              | 254            | 3610         | 12.591           | 16.56          | 6.17         | 1.64             | 16.98          | 10.39        |
| 4     | 3      | 83  | STIP1   | 356              | 358            | 345          | 352              | 91             | 11           | 0.066            | 1.03           | -0.07        | 2160             | 2021           | 230          | 257              | 206            | 1930         | 8.563            | 9.39           | 3.13         | 1.02             | 9.93           | 9.69         |
| 16    | 11     | 79  | GMPR    | 284              | 291            | 269          | 284              | 165            | 15           | 0.042            | 1.06           | -0.03        | 2497             | 2359           | 230          | 237              | 74             | 2267         | 27.324           | 10.86          | 3.76         | 1.08             | 10.36          | 9.61         |
| 2     | 15     | 85  | GPR119  | 443              | 451            | 306          | 312              | 85             | 137          | 1.635            | 1.45           | 0.60         | 2375             | 2147           | 222          | 227              | 70             | 2153         | 22.429           | 10.70          | 3.69         | 1.48             | 10.77          | 7.26         |
| 2     | 12     | 85  | SCIN    | 483              | 489            | 304          | 311              | 83             | 179          | 2.145            | 1.59           | 0.83         | 2954             | 2549           | 223          | 229              | 74             | 2731         | 31.351           | 13.25          | 4.77         | 1.61             | 13.21          | 8.19         |
| 2     | 17     | 87  | FKBP5   | 411              | 422            | 327          | 332              | 90             | 84           | 1                | 1.26           | 0.29         | 3573             | 3380           | 253          | 983              | 2957           | 3320         | 0.777            | 14.12          | 5.14         | 1.27             | 14.21          | 11.18        |
| 1     | 27     | 89  | PFKE3   | 308              | 317            | 270          | 275              | 78             | 38           | 0.538            | 1.14           | 0.11         | 2501             | 2257           | 232          | 244              | 90             | 2269         | 22.367           | 10.78          | 3.72         | 1.20             | 10.19          | 8.47         |
| 2     | 11     | 89  | GLUL    | 375              | 381            | 300          | 305              | 84             | 75           | 0.905            | 1.25           | 0.28         | 2262             | 2264           | 218          | 224              | 71             | 2044         | 28.732           | 10.38          | 3.55         | 1.24             | 9.93           | 8.04         |

**Supplementary Table 3. Continued**

| Block | Column | Row | Name    | F635                       |                              | B635                           |                                     | F635                           |                                     | B635                           |                                     | F635                           |                                     | B635                           |                                     | F635                           |                                     | B635                           |                                     | Z <sub>-</sub> Score <sub>-</sub> Ursolic- Bio | Z <sub>-</sub> Score <sub>-</sub> Ursolic- D-Biotin | I <sub>-</sub> Ursolic- Bio | I <sub>-</sub> Ursolic- D-Biotin | SNR <sub>-</sub> Ursolic- Bio | SNR <sub>-</sub> Ursolic- D-Biotin | Median <sub>-</sub> Ursolic- Bio | Median <sub>-</sub> Ursolic- D-Biotin | F635 - B635 | Mean <sub>-</sub> Ursolic- Bio | Mean <sub>-</sub> Ursolic- D-Biotin | SD <sub>-</sub> Ursolic- Bio | SD <sub>-</sub> Ursolic- D-Biotin | I <sub>-</sub> Ursolic- Bio | I <sub>-</sub> Ursolic- D-Biotin | Mean <sub>-</sub> Ursolic- Bio | Mean <sub>-</sub> Ursolic- D-Biotin | Ratio |
|-------|--------|-----|---------|----------------------------|------------------------------|--------------------------------|-------------------------------------|--------------------------------|-------------------------------------|--------------------------------|-------------------------------------|--------------------------------|-------------------------------------|--------------------------------|-------------------------------------|--------------------------------|-------------------------------------|--------------------------------|-------------------------------------|------------------------------------------------|-----------------------------------------------------|-----------------------------|----------------------------------|-------------------------------|------------------------------------|----------------------------------|---------------------------------------|-------------|--------------------------------|-------------------------------------|------------------------------|-----------------------------------|-----------------------------|----------------------------------|--------------------------------|-------------------------------------|-------|
|       |        |     |         | Mean <sub>-</sub> D-Biotin | Median <sub>-</sub> D-Biotin | Mean <sub>-</sub> Ursolic- Bio | Mean <sub>-</sub> Ursolic- D-Biotin | Mean <sub>-</sub> Ursolic- Bio | Mean <sub>-</sub> Ursolic- D-Biotin | Mean <sub>-</sub> Ursolic- Bio | Mean <sub>-</sub> Ursolic- D-Biotin | Mean <sub>-</sub> Ursolic- Bio | Mean <sub>-</sub> Ursolic- D-Biotin | Mean <sub>-</sub> Ursolic- Bio | Mean <sub>-</sub> Ursolic- D-Biotin | Mean <sub>-</sub> Ursolic- Bio | Mean <sub>-</sub> Ursolic- D-Biotin | Mean <sub>-</sub> Ursolic- Bio | Mean <sub>-</sub> Ursolic- D-Biotin |                                                |                                                     |                             |                                  |                               |                                    |                                  |                                       |             |                                |                                     |                              |                                   |                             |                                  |                                |                                     |       |
| 16    | 30     | 71  | LZFL1   | 387                        | 397                          | 328                            | 334                                 | 87                             | 59                                  | 0.724                          | 1.18                                | 0.17                           | 2450                                | 2189                           | 225                                 | 248                            | 139                                 | 2225                           | 13.964                              | 10.89                                          | 3.77                                                | 1.18                        | 11.15                            | 9.42                          |                                    |                                  |                                       |             |                                |                                     |                              |                                   |                             |                                  |                                |                                     |       |
| 15    | 4      | 11  | CAB51   | 367                        | 379                          | 328                            | 339                                 | 152                            | 39                                  | 0.263                          | 1.12                                | 0.07                           | 2466                                | 2250                           | 268                                 | 281                            | 94                                  | 2198                           | 20.947                              | 9.20                                           | 3.05                                                | 1.15                        | 9.39                             | 8.15                          |                                    |                                  |                                       |             |                                |                                     |                              |                                   |                             |                                  |                                |                                     |       |
| 2     | 18     | 87  | PK3CB   | 517                        | 522                          | 322                            | 328                                 | 84                             | 195                                 | 2.31                           | 1.61                                | 0.86                           | 2244                                | 2057                           | 247                                 | 659                            | 2005                                | 1997                           | 0.697                               | 9.09                                           | 3.00                                                | 1.63                        | 9.23                             | 5.67                          |                                    |                                  |                                       |             |                                |                                     |                              |                                   |                             |                                  |                                |                                     |       |
| 3     | 21     | 87  | PLCD1   | 488                        | 506                          | 333                            | 337                                 | 87                             | 155                                 | 1.943                          | 1.47                                | 0.63                           | 2088                                | 1919                           | 234                                 | 240                            | 73                                  | 1854                           | 23                                  | 1854                                           | 23                                                  | 2.94                        | 1.49                             | 8.91                          | 6.00                               |                                  |                                       |             |                                |                                     |                              |                                   |                             |                                  |                                |                                     |       |
| 16    | 17     | 51  | RFL3    | 290                        | 291                          | 228                            | 234                                 | 72                             | 62                                  | 0.792                          | 1.27                                | 0.32                           | 2325                                | 2177                           | 225                                 | 236                            | 84                                  | 2100                           | 23.107                              | 10.33                                          | 3.53                                                | 1.24                        | 10.26                            | 8.25                          |                                    |                                  |                                       |             |                                |                                     |                              |                                   |                             |                                  |                                |                                     |       |
| 6     | 15     | 1   | GART    | 390                        | 399                          | 322                            | 335                                 | 105                            | 68                                  | 0.61                           | 1.21                                | 0.22                           | 2612                                | 2304                           | 222                                 | 227                            | 72                                  | 2390                           | 28.847                              | 11.77                                          | 4.14                                                | 1.24                        | 11.62                            | 9.40                          |                                    |                                  |                                       |             |                                |                                     |                              |                                   |                             |                                  |                                |                                     |       |
| 6     | 12     | 3   | TOM1    | 344                        | 352                          | 290                            | 296                                 | 81                             | 54                                  | 0.691                          | 1.19                                | 0.18                           | 1985                                | 1819                           | 215                                 | 223                            | 73                                  | 1770                           | 21.863                              | 9.23                                           | 3.07                                                | 1.19                        | 9.40                             | 7.87                          |                                    |                                  |                                       |             |                                |                                     |                              |                                   |                             |                                  |                                |                                     |       |
| 6     | 21     | 1   | L7A4H   | 335                        | 338                          | 300                            | 305                                 | 80                             | 35                                  | 0.413                          | 1.12                                | 0.07                           | 2033                                | 1873                           | 235                                 | 251                            | 94                                  | 1798                           | 17.255                              | 8.65                                           | 2.82                                                | 1.09                        | 8.73                             | 8.01                          |                                    |                                  |                                       |             |                                |                                     |                              |                                   |                             |                                  |                                |                                     |       |
| 5     | 7      | 1   | UBESA   | 431                        | 453                          | 266                            | 271                                 | 79                             | 165                                 | 2.304                          | 1.62                                | 0.88                           | 2244                                | 1971                           | 242                                 | 249                            | 79                                  | 2002                           | 21.797                              | 9.27                                           | 3.08                                                | 1.64                        | 9.48                             | 5.76                          |                                    |                                  |                                       |             |                                |                                     |                              |                                   |                             |                                  |                                |                                     |       |
| 15    | 22     | 83  | SPG20   | 431                        | 454                          | 286                            | 293                                 | 83                             | 145                                 | 1.94                           | 1.51                                | 0.70                           | 2939                                | 2935                           | 246                                 | 254                            | 75                                  | 2693                           | 35.747                              | 11.95                                          | 4.22                                                | 1.41                        | 11.38                            | 8.05                          |                                    |                                  |                                       |             |                                |                                     |                              |                                   |                             |                                  |                                |                                     |       |
| 16    | 7      | 71  | PPP2R1B | 316                        | 328                          | 261                            | 266                                 | 78                             | 55                                  | 0.795                          | 1.21                                | 0.22                           | 2107                                | 2313                           | 237                                 | 253                            | 137                                 | 1870                           | 15.036                              | 8.89                                           | 2.92                                                | 1.19                        | 8.86                             | 7.47                          |                                    |                                  |                                       |             |                                |                                     |                              |                                   |                             |                                  |                                |                                     |       |
| 6     | 11     | 11  | PTGR2   | 338                        | 354                          | 279                            | 288                                 | 81                             | 59                                  | 0.815                          | 1.21                                | 0.22                           | 6392                                | 5264                           | 236                                 | 286                            | 308                                 | 6156                           | 16.162                              | 27.08                                          | 10.63                                               | 1.24                        | 26.56                            | 21.46                         |                                    |                                  |                                       |             |                                |                                     |                              |                                   |                             |                                  |                                |                                     |       |
| 6     | 30     | 9   | NAP1L1  | 444                        | 451                          | 291                            | 297                                 | 82                             | 153                                 | 1.878                          | 1.53                                | 0.73                           | 2457                                | 2282                           | 236                                 | 243                            | 76                                  | 2221                           | 26.829                              | 10.41                                          | 3.57                                                | 1.57                        | 10.60                            | 6.74                          |                                    |                                  |                                       |             |                                |                                     |                              |                                   |                             |                                  |                                |                                     |       |
| 6     | 21     | 9   | PKFP    | 373                        | 391                          | 289                            | 292                                 | 80                             | 84                                  | 1.238                          | 1.29                                | 0.35                           | 1978                                | 1803                           | 222                                 | 238                            | 71                                  | 1756                           | 5.775                               | 8.91                                           | 2.93                                                | 1.28                        | 8.97                             | 6.99                          |                                    |                                  |                                       |             |                                |                                     |                              |                                   |                             |                                  |                                |                                     |       |
| 5     | 23     | 13  | AAGAB   | 453                        | 458                          | 252                            | 257                                 | 73                             | 201                                 | 2.753                          | 1.80                                | 1.16                           | 2183                                | 2038                           | 228                                 | 235                            | 72                                  | 1955                           | 25.042                              | 9.57                                           | 3.21                                                | 1.78                        | 9.55                             | 5.36                          |                                    |                                  |                                       |             |                                |                                     |                              |                                   |                             |                                  |                                |                                     |       |
| 16    | 13     | 71  | CAMP    | 304                        | 305                          | 258                            | 262                                 | 76                             | 46                                  | 0.566                          | 1.18                                | 0.17                           | 2100                                | 2234                           | 231                                 | 237                            | 72                                  | 1869                           | 27.736                              | 9.09                                           | 3.01                                                | 1.19                        | 9.00                             | 7.57                          |                                    |                                  |                                       |             |                                |                                     |                              |                                   |                             |                                  |                                |                                     |       |
| 14    | 29     | 15  | VATL1   | 451                        | 460                          | 356                            | 359                                 | 90                             | 95                                  | 1.122                          | 1.27                                | 0.31                           | 2516                                | 2235                           | 264                                 | 269                            | 78                                  | 2252                           | 25.205                              | 9.53                                           | 3.19                                                | 1.25                        | 9.46                             | 7.55                          |                                    |                                  |                                       |             |                                |                                     |                              |                                   |                             |                                  |                                |                                     |       |
| 14    | 9      | 15  | UPP2    | 415                        | 421                          | 343                            | 348                                 | 87                             | 72                                  | 0.839                          | 1.21                                | 0.22                           | 3844                                | 3532                           | 277                                 | 284                            | 89                                  | 3567                           | 36.494                              | 13.88                                          | 5.04                                                | 1.22                        | 13.63                            | 11.20                         |                                    |                                  |                                       |             |                                |                                     |                              |                                   |                             |                                  |                                |                                     |       |
| 16    | 5      | 87  | ALDH4A1 | 400                        | 403                          | 259                            | 267                                 | 80                             | 141                                 | 1.7                            | 1.54                                | 0.76                           | 6367                                | 5854                           | 249                                 | 261                            | 91                                  | 6118                           | 61.462                              | 25.57                                          | 9.99                                                | 1.50                        | 25.38                            | 16.93                         |                                    |                                  |                                       |             |                                |                                     |                              |                                   |                             |                                  |                                |                                     |       |
| 16    | 3      | 87  | MSN     | 334                        | 342                          | 276                            | 283                                 | 81                             | 58                                  | 0.728                          | 1.21                                | 0.22                           | 2763                                | 2394                           | 247                                 | 256                            | 92                                  | 2516                           | 23.239                              | 11.19                                          | 3.90                                                | 1.23                        | 10.91                            | 8.89                          |                                    |                                  |                                       |             |                                |                                     |                              |                                   |                             |                                  |                                |                                     |       |
| 7     | 22     | 19  | NFKB1   | 617                        | 609                          | 314                            | 317                                 | 88                             | 303                                 | 3.318                          | 1.96                                | 1.43                           | 2492                                | 2302                           | 244                                 | 257                            | 134                                 | 2248                           | 15.261                              | 10.21                                          | 3.48                                                | 1.89                        | 10.53                            | 5.58                          |                                    |                                  |                                       |             |                                |                                     |                              |                                   |                             |                                  |                                |                                     |       |
| 15    | 20     | 85  | ACTN4   | 365                        | 472                          | 306                            | 310                                 | 83                             | 59                                  | 1.952                          | 1.19                                | 0.19                           | 3811                                | 3309                           | 262                                 | 268                            | 85                                  | 3549                           | 38.129                              | 14.55                                          | 5.32                                                | 1.14                        | 14.40                            | 12.63                         |                                    |                                  |                                       |             |                                |                                     |                              |                                   |                             |                                  |                                |                                     |       |
| 7     | 6      | 21  | CTBP1   | 375                        | 387                          | 297                            | 302                                 | 86                             | 78                                  | 0.988                          | 1.26                                | 0.30                           | 2987                                | 2539                           | 226                                 | 233                            | 73                                  | 2761                           | 31.863                              | 13.22                                          | 4.76                                                | 1.27                        | 12.75                            | 10.07                         |                                    |                                  |                                       |             |                                |                                     |                              |                                   |                             |                                  |                                |                                     |       |
| 7     | 1      | 21  | EZF2    | 401                        | 410                          | 290                            | 296                                 | 85                             | 111                                 | 1.341                          | 1.38                                | 0.50                           | 3242                                | 2761                           | 229                                 | 233                            | 72                                  | 3013                           | 35.111                              | 14.16                                          | 5.15                                                | 1.35                        | 14.08                            | 10.41                         |                                    |                                  |                                       |             |                                |                                     |                              |                                   |                             |                                  |                                |                                     |       |
| 16    | 21     | 77  | CATIP   | 288                        | 295                          | 269                            | 273                                 | 80                             | 19                                  | 0.275                          | 1.07                                | -0.01                          | 3269                                | 3152                           | 229                                 | 233                            | 73                                  | 3040                           | 39.986                              | 14.28                                          | 5.20                                                | 1.09                        | 14.27                            | 13.07                         |                                    |                                  |                                       |             |                                |                                     |                              |                                   |                             |                                  |                                |                                     |       |
| 15    | 30     | 67  | SHQ1    | 400                        | 407                          | 273                            | 279                                 | 79                             | 127                                 | 1.62                           | 1.47                                | 0.63                           | 4115                                | 3616                           | 285                                 | 285                            | 512                                 | 3830                           | 3.749                               | 14.44                                          | 5.27                                                | 1.53                        | 15.16                            | 9.94                          |                                    |                                  |                                       |             |                                |                                     |                              |                                   |                             |                                  |                                |                                     |       |
| 9     | 32     | 89  | TEX33   | 574                        | 575                          | 350                            | 357                                 | 91                             | 224                                 | 2.396                          | 1.64                                | 0.91                           | 3714                                | 3377                           | 266                                 | 274                            | 105                                 | 3448                           | 29.552                              | 13.96                                          | 5.07                                                | 1.62                        | 13.54                            | 8.37                          |                                    |                                  |                                       |             |                                |                                     |                              |                                   |                             |                                  |                                |                                     |       |
| 12    | 10     | 81  | EIF2B1  | 331                        | 351                          | 244                            | 249                                 | 73                             | 87                                  | 1.397                          | 1.36                                | 0.46                           | 2765                                | 2535                           | 231                                 | 240                            | 79                                  | 2534                           | 29.051                              | 11.97                                          | 4.23                                                | 1.40                        | 11.80                            | 8.41                          |                                    |                                  |                                       |             |                                |                                     |                              |                                   |                             |                                  |                                |                                     |       |
| 13    | 6      | 67  | PTP4A2  | 455                        | 461                          | 404                            | 408                                 | 98                             | 51                                  | 0.541                          | 1.13                                | 0.08                           | 2224                                | 2224                           | 271                                 | 286                            | 130                                 | 2172                           | 14.908                              | 9.01                                           | 2.97                                                | 1.09                        | 8.90                             | 8.14                          |                                    |                                  |                                       |             |                                |                                     |                              |                                   |                             |                                  |                                |                                     |       |
| 16    | 18     | 75  | RAB1B   | 332                        | 328                          | 260                            | 266                                 | 80                             | 72                                  | 0.775                          | 1.28                                | 0.33                           | 2501                                | 2285                           | 227                                 | 234                            | 70                                  | 2274                           | 29.3                                | 11.02                                          | 3.82                                                | 1.23                        | 10.87                            | 8.85                          |                                    |                                  |                                       |             |                                |                                     |                              |                                   |                             |                                  |                                |                                     |       |
| 13    | 14     | 15  | GGLW1   | 411                        | 415                          | 373                            | 379                                 | 96                             | 38                                  | 0.375                          | 1.10                                | 0.05                           | 2756                                | 2454                           | 251                                 | 259                            | 80                                  | 2505                           | 27.438                              | 10.98                                          | 3.81                                                | 1.13                        | 11.16                            | 9.85                          |                                    |                                  |                                       |             |                                |                                     |                              |                                   |                             |                                  |                                |                                     |       |
| 15    | 15     | 85  | PNMT    | 332                        | 335                          | 306                            | 309                                 | 81                             | 26                                  | 0.321                          | 1.08                                | 0.02                           | 4408                                | 4002                           | 253                                 | 258                            | 74                                  | 4155                           | 50.595                              | 17.42                                          | 6.54                                                | 1.12                        | 17.56                            | 15.72                         |                                    |                                  |                                       |             |                                |                                     |                              |                                   |                             |                                  |                                |                                     |       |
| 14    | 6      | 7   | YHHAQ   | 364                        | 374                          | 336                            | 343                                 | 90                             | 28                                  | 0.344                          | 1.08                                | 0.02                           | 2707                                | 2437                           | 292                                 | 348                            | 208                                 | 2415                           | 10.043                              | 9.27                                           | 3.08                                                | 1.08                        | 9.35                             | 8.66                          |                                    |                                  |                                       |             |                                |                                     |                              |                                   |                             |                                  |                                |                                     |       |
| 14    | 9      | 79  | PURA    | 406                        | 416                          | 341                            | 352                                 | 104                            | 65                                  | 0.615                          | 1.19                                | 0.19                           | 2793                                | 2681                           | 275                                 | 283                            | 113                                 | 2518                           | 21.221                              | 10.16                                          | 3.46                                                | 1.24                        | 9.92                             | 8.03                          |                                    |                                  |                                       |             |                                |                                     |                              |                                   |                             |                                  |                                |                                     |       |
| 15    | 23     | 87  | TRIP10  | 331                        | 340                          | 292                            | 296                                 | 82                             | 39                                  | 0.537                          | 1.13                                | 0.10                           | 3262                                | 3035                           | 237                                 | 245                            | 77                                  | 3025                           | 36.234                              | 13.76                                          | 4.99                                                | 1.11                        | 13.54                            | 12.20                         |                                    |                                  |                                       |             |                                |                                     |                              |                                   |                             |                                  |                                |                                     |       |
| 13    | 32     | 81  | METTL6  | 433                        | 447                          | 347                            | 355                                 | 91                             | 86                                  | 1.011                          | 1.25                                | 0.28                           | 2554                                | 2762                           | 266                                 | 273                            | 78                                  | 2288                           | 31.91                               | 9.60                                           | 3.22                                                | 1.23                        | 9.80                             | 7.96                          |                                    |                                  |                                       |             |                                |                                     |                              |                                   |                             |                                  |                                |                                     |       |
| 8     | 6      | 27  | PPM1A   | 337                        | 340                          | 326                            | 330                                 | 90                             | 11                                  | 0.111                          | 1.03                                | -0.06                          | 2374                                | 2195                           | 236                                 | 244                            | 77                                  | 2338                           | 25.338                              | 10.91                                          | 3.78                                                | 1.05                        | 11.04                            | 10.47                         |                                    |                                  |                                       |             |                                |                                     |                              |                                   |                             |                                  |                                |                                     |       |

Supplementary Table 3. Continued

| Block | Column | Row | Name     | F635             |                | B635             |                | F635         |                  | B635           |              | F635             |                | B635         |                  | F635           |              | B635             |                | F635         |                  | B635           |              | F635             |                | B635         |                  |                |              |                  |                |              |                  |                |
|-------|--------|-----|----------|------------------|----------------|------------------|----------------|--------------|------------------|----------------|--------------|------------------|----------------|--------------|------------------|----------------|--------------|------------------|----------------|--------------|------------------|----------------|--------------|------------------|----------------|--------------|------------------|----------------|--------------|------------------|----------------|--------------|------------------|----------------|
|       |        |     |          | Median_ D-Biotin | Mean_ D-Biotin | Median_ D-Biotin | Mean_ D-Biotin | SD_ D-Biotin | Median_ D-Biotin | Mean_ D-Biotin | SD_ D-Biotin | Median_ D-Biotin | Mean_ D-Biotin | SD_ D-Biotin | Median_ D-Biotin | Mean_ D-Biotin | SD_ D-Biotin | Median_ D-Biotin | Mean_ D-Biotin | SD_ D-Biotin | Median_ D-Biotin | Mean_ D-Biotin | SD_ D-Biotin | Median_ D-Biotin | Mean_ D-Biotin | SD_ D-Biotin | Median_ D-Biotin | Mean_ D-Biotin | SD_ D-Biotin | Median_ D-Biotin | Mean_ D-Biotin | SD_ D-Biotin | Median_ D-Biotin | Mean_ D-Biotin |
| 14    | 4      | 11  | EFAEBP1  | 403              | 413            | 345              | 348            | 86           | 58               | 0.756          | 1.17         | 0.15             | 2456           | 2202         | 276              | 280            | 79           | 2180             | 24.329         | 8.90         | 2.93             | 1.17           | 8.89         | 7.60             |                |              |                  |                |              |                  |                |              |                  |                |
| 16    | 18     | 67  | STAU2    | 396              | 418            | 246              | 254            | 86           | 150              | 1.907          | 1.61         | 0.86             | 2486           | 2491         | 227              | 235            | 73           | 2259             | 30.904         | 10.95        | 3.80             | 1.58           | 10.77        | 6.80             |                |              |                  |                |              |                  |                |              |                  |                |
| 14    | 9      | 75  | ATP6V1C2 | 420              | 426            | 336              | 344            | 90           | 84               | 0.911          | 1.25         | 0.28             | 2494           | 2515         | 274              | 280            | 82           | 2220             | 27.256         | 9.10         | 3.01             | 1.28           | 9.05         | 7.07             |                |              |                  |                |              |                  |                |              |                  |                |
| 6     | 10     | 31  | EPB41    | 632              | 631            | 261              | 269            | 95           | 371              | 3.811          | 2.42         | 2.17             | 2216           | 2198         | 213              | 225            | 178          | 2003             | 11.084         | 10.40        | 3.56             | 2.38           | 10.43        | 4.38             |                |              |                  |                |              |                  |                |              |                  |                |
| 13    | 27     | 35  | MUC20    | 453              | 464            | 349              | 356            | 98           | 104              | 1.102          | 1.30         | 0.36             | 2308           | 2412         | 268              | 272            | 77           | 2040             | 27.792         | 8.61         | 2.80             | 1.29           | 8.76         | 6.77             |                |              |                  |                |              |                  |                |              |                  |                |
| 14    | 20     | 87  | TCPT1L1  | 380              | 390            | 339              | 347            | 89           | 41               | 0.483          | 1.12         | 0.08             | 3509           | 3210         | 282              | 290            | 83           | 3227             | 35.181         | 12.44        | 4.43             | 1.17           | 12.35        | 10.53            |                |              |                  |                |              |                  |                |              |                  |                |
| 7     | 23     | 37  | NME8     | 517              | 517            | 305              | 312            | 84           | 212              | 2.44           | 1.70         | 1.00             | 2639           | 2318         | 239              | 245            | 76           | 2400             | 27.276         | 11.04        | 3.83             | 1.67           | 10.96        | 6.55             |                |              |                  |                |              |                  |                |              |                  |                |
| 9     | 22     | 87  | ALDH1L1  | 358              | 370            | 356              | 361            | 90           | 2                | 0.1            | 1.01         | -0.11            | 3117           | 2880         | 251              | 256            | 78           | 2866             | 35.641         | 12.42        | 4.42             | 1.04           | 12.26        | 11.77            |                |              |                  |                |              |                  |                |              |                  |                |
| 5     | 24     | 41  | ACSBG1   | 297              | 307            | 229              | 232            | 69           | 68               | 1.087          | 1.30         | 0.36             | 4953           | 4245         | 212              | 224            | 89           | 4741             | 45.18          | 23.36        | 9.06             | 1.26           | 22.40        | 17.72            |                |              |                  |                |              |                  |                |              |                  |                |
| 14    | 3      | 23  | FMOS     | 451              | 465            | 339              | 348            | 94           | 112              | 1.245          | 1.33         | 0.41             | 4675           | 3936         | 295              | 382            | 400          | 4380             | 8.885          | 15.85        | 5.87             | 1.32           | 16.18        | 12.28            |                |              |                  |                |              |                  |                |              |                  |                |
| 5     | 30     | 37  | GDH2     | 261              | 271            | 228              | 233            | 73           | 33               | 0.521          | 1.14         | 0.11             | 2963           | 2756         | 228              | 235            | 80           | 2735             | 31.513         | 13.00        | 4.66             | 1.18           | 13.00        | 11.02            |                |              |                  |                |              |                  |                |              |                  |                |
| 6     | 13     | 39  | ILKAP    | 265              | 276            | 255              | 263            | 78           | 10               | 0.167          | 1.04         | -0.06            | 2048           | 1981         | 215              | 220            | 72           | 1833             | 24.458         | 9.53         | 3.19             | 1.03           | 9.43         | 9.13             |                |              |                  |                |              |                  |                |              |                  |                |
| 7     | 10     | 41  | TGM1     | 449              | 454            | 290              | 299            | 86           | 159              | 1.802          | 1.55         | 0.76             | 2897           | 2571         | 234              | 242            | 75           | 2663             | 31.053         | 12.38        | 4.40             | 1.55           | 12.20        | 7.87             |                |              |                  |                |              |                  |                |              |                  |                |
| 14    | 15     | 85  | AK5      | 567              | 565            | 349              | 353            | 90           | 218              | 2.356          | 1.62         | 0.89             | 2448           | 2444         | 268              | 273            | 77           | 2180             | 28.195         | 9.13         | 3.03             | 1.60           | 8.95         | 5.60             |                |              |                  |                |              |                  |                |              |                  |                |
| 5     | 22     | 45  | ASMTL    | 279              | 287            | 222              | 226            | 70           | 57               | 0.871          | 1.26         | 0.29             | 2089           | 1993         | 205              | 213            | 71           | 1884             | 25.07          | 10.19        | 3.47             | 1.26           | 10.15        | 8.07             |                |              |                  |                |              |                  |                |              |                  |                |
| 8     | 22     | 43  | CLIC4    | 373              | 378            | 355              | 362            | 90           | 18               | 0.178          | 1.05         | -0.04            | 2766           | 2452         | 231              | 239            | 76           | 2535             | 29.118         | 11.97        | 4.23             | 1.10           | 11.95        | 10.90            |                |              |                  |                |              |                  |                |              |                  |                |
| 6     | 22     | 43  | TKFC     | 282              | 299            | 255              | 260            | 80           | 27               | 0.488          | 1.11         | 0.05             | 3215           | 2960         | 215              | 222            | 74           | 3000             | 37             | 14.95        | 5.49             | 1.14           | 14.53        | 12.27            |                |              |                  |                |              |                  |                |              |                  |                |
| 7     | 22     | 47  | DDB1     | 430              | 436            | 295              | 300            | 81           | 135              | 1.679          | 1.46         | 0.62             | 2039           | 1932         | 232              | 238            | 74           | 1807             | 22.892         | 8.79         | 2.88             | 1.45           | 8.94         | 6.17             |                |              |                  |                |              |                  |                |              |                  |                |
| 6     | 17     | 43  | GALE     | 283              | 287            | 243              | 248            | 76           | 40               | 0.513          | 1.16         | 0.15             | 2001           | 1808         | 211              | 216            | 69           | 1790             | 23.072         | 9.48         | 3.17             | 1.17           | 9.27         | 7.94             |                |              |                  |                |              |                  |                |              |                  |                |
| 8     | 14     | 45  | MCM6     | 452              | 458            | 345              | 349            | 88           | 107              | 1.239          | 1.31         | 0.38             | 2683           | 2710         | 236              | 247            | 100          | 2447             | 24.63          | 11.37        | 3.97             | 1.30           | 11.06        | 8.47             |                |              |                  |                |              |                  |                |              |                  |                |
| 5     | 29     | 45  | USO1     | 275              | 285            | 224              | 231            | 71           | 51               | 0.761          | 1.23         | 0.25             | 2260           | 2091         | 208              | 217            | 71           | 2052             | 26.394         | 10.87        | 3.76             | 1.24           | 10.87        | 8.78             |                |              |                  |                |              |                  |                |              |                  |                |
| 8     | 24     | 43  | FAM120B  | 396              | 416            | 358              | 364            | 92           | 38               | 0.565          | 1.11         | 0.05             | 2182           | 2067         | 226              | 235            | 74           | 1956             | 24.757         | 9.65         | 3.25             | 1.13           | 9.43         | 8.31             |                |              |                  |                |              |                  |                |              |                  |                |
| 6     | 1      | 45  | HGS      | 319              | 338            | 220              | 226            | 71           | 99               | 1.577          | 1.45         | 0.61             | 1893           | 1817         | 210              | 216            | 72           | 1683             | 22.236         | 9.01         | 2.97             | 1.48           | 9.10         | 6.17             |                |              |                  |                |              |                  |                |              |                  |                |
| 6     | 16     | 45  | HKI      | 331              | 342            | 260              | 265            | 138          | 71               | 0.558          | 1.27         | 0.32             | 5515           | 4883         | 216              | 224            | 99           | 5299             | 47.061         | 25.53        | 9.98             | 1.28           | 24.79        | 19.37            |                |              |                  |                |              |                  |                |              |                  |                |
| 6     | 11     | 45  | NADSYN1  | 280              | 294            | 236              | 243            | 78           | 44               | 0.654          | 1.19         | 0.18             | 2529           | 2492         | 216              | 244            | 295          | 2313             | 7.62           | 11.71        | 4.12             | 1.17           | 11.78        | 10.08            |                |              |                  |                |              |                  |                |              |                  |                |
| 7     | 6      | 43  | UBA1     | 320              | 329            | 279              | 284            | 78           | 41               | 0.577          | 1.15         | 0.12             | 2105           | 2025         | 221              | 230            | 71           | 1884             | 25.282         | 9.52         | 3.19             | 1.12           | 9.77         | 8.69             |                |              |                  |                |              |                  |                |              |                  |                |
| 8     | 28     | 45  | PSMD5    | 435              | 438            | 363              | 371            | 93           | 72               | 0.72           | 1.20         | 0.20             | 2220           | 2006         | 245              | 256            | 179          | 1975             | 9.777          | 9.06         | 2.99             | 1.19           | 9.29         | 7.82             |                |              |                  |                |              |                  |                |              |                  |                |
| 7     | 13     | 47  | SPR      | 365              | 375            | 294              | 299            | 80           | 71               | 0.95           | 1.24         | 0.27             | 4534           | 4237         | 225              | 234            | 72           | 4309             | 55.597         | 20.15        | 7.69             | 1.27           | 20.03        | 15.79            |                |              |                  |                |              |                  |                |              |                  |                |
| 7     | 12     | 49  | IGIC     | 325              | 333            | 294              | 298            | 80           | 31               | 0.438          | 1.11         | 0.05             | 2205           | 2142         | 226              | 242            | 141          | 1979             | 13.475         | 9.76         | 3.29             | 1.15           | 9.69         | 8.45             |                |              |                  |                |              |                  |                |              |                  |                |
| 6     | 15     | 51  | NASP     | 248              | 253            | 245              | 252            | 72           | 3                | 0.014          | 1.01         | -0.10            | 1990           | 1902         | 227              | 276            | 202          | 1763             | 8.05           | 8.77         | 2.87             | 1.00           | 9.16         | 9.16             |                |              |                  |                |              |                  |                |              |                  |                |
| 16    | 30     | 69  | OGFOD1   | 451              | 454            | 321              | 330            | 88           | 130              | 1.409          | 1.40         | 0.53             | 2664           | 2275         | 238              | 265            | 133          | 2426             | 15.113         | 11.19        | 3.90             | 1.39           | 10.83        | 7.78             |                |              |                  |                |              |                  |                |              |                  |                |
| 6     | 23     | 49  | PRUNE    | 416              | 415            | 246              | 253            | 74           | 170              | 2.162          | 1.69         | 0.99             | 1988           | 1822         | 219              | 229            | 92           | 1769             | 17.315         | 9.08         | 3.00             | 1.65           | 9.41         | 5.70             |                |              |                  |                |              |                  |                |              |                  |                |
| 7     | 17     | 49  | ANKKHD1  | 353              | 355            | 291              | 298            | 105          | 62               | 0.543          | 1.21         | 0.22             | 2396           | 2171         | 246              | 256            | 91           | 2150             | 21.044         | 9.74         | 3.28             | 1.22           | 9.74         | 8.00             |                |              |                  |                |              |                  |                |              |                  |                |
| 6     | 8      | 51  | HENMT1   | 330              | 338            | 232              | 237            | 73           | 98               | 1.384          | 1.42         | 0.56             | 2500           | 2378         | 203              | 211            | 70           | 2297             | 30.957         | 12.32        | 4.37             | 1.37           | 12.29        | 8.95             |                |              |                  |                |              |                  |                |              |                  |                |
| 7     | 32     | 49  | CC15     | 386              | 403            | 319              | 327            | 87           | 67               | 0.874          | 1.21         | 0.22             | 3715           | 3367         | 234              | 240            | 82           | 3481             | 38.134         | 15.88        | 5.88             | 1.25           | 16.31        | 13.07            |                |              |                  |                |              |                  |                |              |                  |                |
| 7     | 22     | 51  | IMAGEA9  | 687              | 681            | 314              | 316            | 85           | 373              | 4.294          | 2.19         | 1.79             | 2374           | 2165         | 249              | 257            | 86           | 2125             | 22.186         | 9.53         | 3.19             | 2.22           | 10.01        | 4.51             |                |              |                  |                |              |                  |                |              |                  |                |
| 15    | 31     | 73  | PMM2     | 278              | 285            | 276              | 280            | 80           | 2                | 0.063          | 1.01         | -0.11            | 2797           | 2604         | 238              | 242            | 74           | 2559             | 31.919         | 11.75        | 4.14             | 1.03           | 12.00        | 11.60            |                |              |                  |                |              |                  |                |              |                  |                |









Supplementary Table 3. Continued

| Block | Column | Row | Name      | F635  |         |     | F635  |         |     | F635   |         |       | F635  |         |     | F635  |         |      | F635   |         |      |       |         |       |
|-------|--------|-----|-----------|-------|---------|-----|-------|---------|-----|--------|---------|-------|-------|---------|-----|-------|---------|------|--------|---------|------|-------|---------|-------|
|       |        |     |           | Mean_ | Median_ | SD_ | Mean_ | Median_ | SD_ | Mean_  | Median_ | SD_   | Mean_ | Median_ | SD_ | Mean_ | Median_ | SD_  | Mean_  | Median_ | SD_  | Mean_ | Median_ | SD_   |
| 9     | 25     | 35  | RTCA      | 345   | 347     | 282 | 287   | 81      | 63  | 0.741  | 1.22    | 0.24  | 4364  | 3937    | 239 | 243   | 77      | 4125 | 47974  | 18.26   | 6.89 | 1.21  | 18.17   | 15.00 |
| 10    | 4      | 31  | SCG3      | 399   | 398     | 263 | 270   | 78      | 136 | 1.641  | 1.52    | 0.71  | 1957  | 1787    | 227 | 235   | 101     | 1730 | 15.366 | 8.62    | 2.81 | 1.49  | 8.76    | 5.89  |
| 11    | 31     | 33  | CLIC1     | 296   | 307     | 291 | 296   | 62      | 5   | 0.134  | 1.02    | -0.09 | 2307  | 1970    | 204 | 211   | 77      | 2103 | 22.844 | 11.31   | 3.95 | 1.07  | 11.63   | 10.91 |
| 12    | 10     | 35  | HRAS      | 399   | 409     | 337 | 344   | 90      | 62  | 0.722  | 1.18    | 0.28  | 2031  | 2031    | 209 | 215   | 76      | 2116 | 23.895 | 11.12   | 3.87 | 1.20  | 11.27   | 9.41  |
| 10    | 31     | 35  | NLN       | 409   | 407     | 218 | 222   | 68      | 191 | 2.721  | 1.88    | 1.29  | 3137  | 2768    | 225 | 233   | 81      | 2912 | 31.296 | 13.94   | 5.06 | 1.87  | 13.25   | 7.07  |
| 10    | 7      | 31  | PSM3      | 503   | 521     | 257 | 264   | 78      | 246 | 3.295  | 1.96    | 1.42  | 4102  | 3794    | 232 | 239   | 77      | 3870 | 46.169 | 17.68   | 6.65 | 1.94  | 18.12   | 9.36  |
| 12    | 13     | 33  | TRIM16    | 507   | 512     | 351 | 353   | 89      | 156 | 1.787  | 1.44    | 0.60  | 1954  | 1780    | 210 | 219   | 121     | 1744 | 12.901 | 9.30    | 3.10 | 1.42  | 9.30    | 6.56  |
| 11    | 12     | 37  | FASN_frag | 305   | 307     | 221 | 229   | 71      | 84  | 1.099  | 1.38    | 0.49  | 2219  | 2049    | 213 | 219   | 72      | 2006 | 25.417 | 10.42   | 3.57 | 1.39  | 10.42   | 7.51  |
| 12    | 26     | 37  | MAP2K2    | 570   | 569     | 359 | 365   | 88      | 211 | 2.318  | 1.59    | 0.83  | 2124  | 1898    | 220 | 226   | 73      | 1904 | 22.904 | 9.65    | 3.25 | 1.55  | 9.70    | 6.24  |
| 11    | 20     | 37  | POCD2     | 304   | 314     | 249 | 256   | 75      | 55  | 0.773  | 1.22    | 0.24  | 2722  | 2559    | 195 | 204   | 69      | 2527 | 34.13  | 13.96   | 5.07 | 1.23  | 13.51   | 10.98 |
| 10    | 2      | 37  | SRM       | 387   | 393     | 288 | 291   | 81      | 99  | 1.259  | 1.34    | 0.43  | 2829  | 2492    | 246 | 257   | 95      | 2583 | 23.526 | 11.50   | 4.03 | 1.35  | 11.52   | 8.52  |
| 10    | 14     | 37  | AK1       | 294   | 302     | 273 | 277   | 74      | 21  | 0.338  | 1.08    | 0.01  | 2234  | 2011    | 227 | 233   | 73      | 2007 | 24.356 | 9.84    | 3.33 | 1.09  | 9.81    | 8.96  |
| 11    | 17     | 41  | ALDH1A1   | 363   | 372     | 240 | 246   | 75      | 123 | 1.68   | 1.51    | 0.71  | 3618  | 3137    | 213 | 222   | 74      | 3405 | 39.392 | 16.99   | 6.35 | 1.50  | 16.65   | 11.07 |
| 12    | 8      | 41  | CRNN      | 337   | 346     | 326 | 334   | 86      | 11  | 0.14   | 1.03    | -0.06 | 1955  | 1770    | 205 | 214   | 75      | 1750 | 20.747 | 9.54    | 3.20 | 1.05  | 9.43    | 8.96  |
| 14    | 15     | 73  | ACOT7     | 395   | 401     | 331 | 334   | 89      | 64  | 0.753  | 1.19    | 0.19  | 7261  | 6248    | 297 | 307   | 91      | 6964 | 65.286 | 24.45   | 9.52 | 1.18  | 24.55   | 20.83 |
| 13    | 19     | 15  | C19orf73  | 464   | 474     | 371 | 375   | 88      | 93  | 1.125  | 1.25    | 0.28  | 3207  | 3053    | 265 | 276   | 142     | 2942 | 19.556 | 12.10   | 4.28 | 1.23  | 12.17   | 9.87  |
| 12    | 7      | 41  | ANKK2     | 347   | 356     | 323 | 328   | 86      | 24  | 0.326  | 1.07    | 0.00  | 2438  | 2143    | 228 | 247   | 104     | 2210 | 18.231 | 10.69   | 3.69 | 1.08  | 10.97   | 10.12 |
| 10    | 28     | 39  | ATIC      | 341   | 354     | 232 | 240   | 74      | 109 | 1.541  | 1.47    | 0.64  | 6084  | 5422    | 242 | 250   | 81      | 5842 | 63.852 | 25.14   | 9.81 | 1.52  | 25.00   | 16.40 |
| 9     | 21     | 39  | ATP6V0D1  | 394   | 424     | 286 | 291   | 81      | 108 | 1.642  | 1.38    | 0.49  | 3665  | 3115    | 262 | 291   | 162     | 3403 | 17.432 | 13.99   | 5.08 | 1.46  | 14.36   | 9.81  |
| 11    | 10     | 41  | DCN       | 259   | 270     | 232 | 237   | 74      | 27  | 0.446  | 1.12    | 0.07  | 2536  | 2303    | 234 | 252   | 103     | 2302 | 19.913 | 10.84   | 3.75 | 1.11  | 11.04   | 9.94  |
| 11    | 30     | 37  | MAT2A     | 357   | 362     | 299 | 302   | 83      | 58  | 0.723  | 1.19    | 0.19  | 1799  | 1812    | 199 | 213   | 93      | 1600 | 17.194 | 9.04    | 2.99 | 1.18  | 9.04    | 7.66  |
| 9     | 7      | 39  | STUB1     | 510   | 515     | 306 | 311   | 83      | 204 | 2.458  | 1.67    | 0.95  | 3647  | 3165    | 227 | 236   | 91      | 3420 | 32.187 | 16.07   | 5.96 | 1.67  | 16.21   | 9.71  |
| 11    | 14     | 43  | SNX9      | 513   | 509     | 234 | 241   | 70      | 279 | 3.829  | 2.19    | 1.80  | 2278  | 2140    | 217 | 224   | 71      | 2061 | 26.986 | 10.50   | 3.60 | 2.21  | 10.44   | 4.73  |
| 14    | 21     | 9   | GLRX      | 354   | 362     | 328 | 336   | 87      | 26  | 0.299  | 1.08    | 0.01  | 2453  | 2267    | 261 | 268   | 80      | 2192 | 24.988 | 9.40    | 3.14 | 1.06  | 9.36    | 8.80  |
| 10    | 13     | 85  | IL36A     | 372   | 377     | 335 | 342   | 89      | 37  | 0.393  | 1.11    | 0.06  | 2837  | 2521    | 259 | 265   | 77      | 2578 | 29.299 | 10.95   | 3.80 | 1.12  | 10.77   | 9.59  |
| 14    | 31     | 9   | PFN2      | 388   | 399     | 343 | 348   | 91      | 45  | 0.56   | 1.13    | 0.09  | 3081  | 2862    | 262 | 268   | 79      | 2819 | 32.835 | 11.76   | 4.14 | 1.08  | 11.83   | 10.91 |
| 10    | 7      | 85  | RBP1      | 322   | 330     | 325 | 333   | 88      | -3  | -0.034 | 0.99    | -0.13 | 2367  | 2124    | 269 | 276   | 86      | 2098 | 21.488 | 8.80    | 2.88 | 1.00  | 8.85    | 8.83  |
| 10    | 22     | 51  | HK3       | 521   | 531     | 289 | 293   | 82      | 232 | 2.902  | 1.80    | 1.17  | 2880  | 2591    | 239 | 249   | 92      | 2641 | 25.457 | 12.05   | 4.26 | 1.81  | 11.42   | 6.31  |
| 15    | 11     | 85  | PRMT5     | 377   | 392     | 325 | 334   | 98      | 52  | 0.592  | 1.16    | 0.14  | 4147  | 4406    | 261 | 275   | 117     | 3886 | 35.308 | 15.89   | 5.89 | 1.18  | 15.83   | 13.45 |
| 11    | 27     | 53  | PSMB6     | 353   | 373     | 289 | 359   | 1118    | 64  | 0.013  | 1.22    | 0.24  | 3134  | 2807    | 235 | 242   | 75      | 2899 | 34.2   | 13.34   | 4.81 | 1.25  | 13.45   | 10.78 |
| 14    | 30     | 77  | PSMD7     | 384   | 386     | 330 | 335   | 88      | 54  | 0.58   | 1.16    | 0.14  | 4100  | 3841    | 272 | 279   | 99      | 3828 | 35.98  | 15.07   | 5.54 | 1.17  | 15.01   | 12.81 |
| 11    | 23     | 57  | ASB9      | 355   | 359     | 264 | 279   | 136     | 91  | 0.588  | 1.34    | 0.44  | 2221  | 2078    | 229 | 238   | 85      | 1992 | 21.647 | 9.70    | 3.26 | 1.29  | 9.39    | 7.28  |
| 12    | 15     | 55  | DHRS1     | 393   | 401     | 344 | 348   | 89      | 49  | 0.596  | 1.14    | 0.11  | 2547  | 2688    | 209 | 216   | 82      | 2338 | 30.146 | 12.19   | 4.32 | 1.13  | 11.78   | 10.42 |
| 13    | 26     | 69  | ZNF783    | 420   | 441     | 345 | 350   | 92      | 75  | 0.989  | 1.22    | 0.23  | 6654  | 5742    | 293 | 301   | 99      | 6361 | 54.96  | 22.71   | 8.78 | 1.26  | 22.78   | 18.11 |
| 14    | 30     | 73  | ISG15     | 355   | 354     | 322 | 328   | 87      | 33  | 0.299  | 1.10    | 0.05  | 3526  | 3261    | 263 | 268   | 79      | 3263 | 37.886 | 13.41   | 4.84 | 1.10  | 13.18   | 12.02 |
| 9     | 29     | 59  | KLHL14    | 429   | 433     | 324 | 336   | 169     | 105 | 0.574  | 1.32    | 0.40  | 2258  | 2182    | 259 | 346   | 329     | 1999 | 5.581  | 8.72    | 2.85 | 1.32  | 8.94    | 6.77  |
| 11    | 1      | 55  | CPT1A     | 380   | 389     | 281 | 285   | 86      | 99  | 1.209  | 1.35    | 0.45  | 2226  | 2151    | 230 | 241   | 80      | 1996 | 23.875 | 9.68    | 3.26 | 1.35  | 9.38    | 6.96  |

Supplementary Table 3. Continued

| Block | Column | Row | Name                     | F635                       |                          |                        | F635                       |                          |                        | F635                       |                          |                        | F635                       |                          |                        | F635                          |                             |                           | I <sub>u</sub> Score <sub>Ursolic-Bio</sub> | Z <sub>u</sub> Score <sub>Ursolic-Bio</sub> | I <sub>Mean<sub>Ursolic-Bio</sub></sub> | I <sub>Mean<sub>Ursolic-Bio</sub></sub> Ratio |       |       |
|-------|--------|-----|--------------------------|----------------------------|--------------------------|------------------------|----------------------------|--------------------------|------------------------|----------------------------|--------------------------|------------------------|----------------------------|--------------------------|------------------------|-------------------------------|-----------------------------|---------------------------|---------------------------------------------|---------------------------------------------|-----------------------------------------|-----------------------------------------------|-------|-------|
|       |        |     |                          | Median <sub>D-Biotin</sub> | Mean <sub>D-Biotin</sub> | SD <sub>D-Biotin</sub> | Median <sub>D-Biotin</sub> | Mean <sub>D-Biotin</sub> | SD <sub>D-Biotin</sub> | Median <sub>D-Biotin</sub> | Mean <sub>D-Biotin</sub> | SD <sub>D-Biotin</sub> | Median <sub>D-Biotin</sub> | Mean <sub>D-Biotin</sub> | SD <sub>D-Biotin</sub> | Median <sub>Ursolic-Bio</sub> | Mean <sub>Ursolic-Bio</sub> | SD <sub>Ursolic-Bio</sub> |                                             |                                             |                                         |                                               | SNR   |       |
| 10    | 28     | 59  | I <sub>GL</sub>          | 345                        | 355                      | 292                    | 295                        | 81                       | 53                     | 0.741                      | 1.18                     | 0.17                   | 2844                       | 2662                     | 240                    | 246                           | 76                          | 2604                      | 31789                                       | 11.85                                       | 4.18                                    | 1.20                                          | 11.46 | 9.55  |
| 11    | 18     | 57  | S <sub>CLT1</sub>        | 404                        | 405                      | 255                    | 261                        | 77                       | 149                    | 1.87                       | 1.58                     | 0.82                   | 3823                       | 3557                     | 239                    | 245                           | 78                          | 3584                      | 42,462                                      | 16.00                                       | 5.93                                    | 1.60                                          | 15.36 | 9.63  |
| 12    | 12     | 61  | D <sub>MA1C7</sub>       | 351                        | 356                      | 302                    | 307                        | 84                       | 49                     | 0.583                      | 1.16                     | 0.14                   | 3170                       | 3052                     | 212                    | 216                           | 71                          | 2958                      | 39,944                                      | 14.95                                       | 5.49                                    | 1.14                                          | 14.96 | 13.16 |
| 13    | 30     | 7   | C <sub>DCI184</sub>      | 385                        | 389                      | 347                    | 354                        | 91                       | 38                     | 0.885                      | 1.11                     | 0.06                   | 3308                       | 3068                     | 263                    | 270                           | 81                          | 3045                      | 34,543                                      | 12.58                                       | 4.49                                    | 1.10                                          | 12.39 | 11.28 |
| 12    | 2      | 61  | N <sub>CF1</sub>         | 385                        | 390                      | 307                    | 321                        | 109                      | 78                     | 0.633                      | 1.25                     | 0.29                   | 3588                       | 3088                     | 233                    | 239                           | 81                          | 3355                      | 35,173                                      | 15.40                                       | 5.68                                    | 1.23                                          | 15.87 | 12.87 |
| 11    | 3      | 61  | R <sub>EP5</sub>         | 347                        | 348                      | 293                    | 300                        | 80                       | 54                     | 0.6                        | 1.18                     | 0.18                   | 2484                       | 2386                     | 242                    | 250                           | 117                         | 2242                      | 18,256                                      | 10.26                                       | 3.50                                    | 1.15                                          | 10.28 | 8.93  |
| 12    | 14     | 61  | R <sub>PSA</sub>         | 371                        | 380                      | 302                    | 307                        | 83                       | 69                     | 0.88                       | 1.23                     | 0.25                   | 1895                       | 1765                     | 216                    | 221                           | 69                          | 1679                      | 22,377                                      | 8.77                                        | 2.87                                    | 1.23                                          | 8.71  | 7.07  |
| 10    | 29     | 65  | K <sub>DMMIA</sub>       | 484                        | 492                      | 305                    | 308                        | 84                       | 179                    | 2.19                       | 1.59                     | 0.83                   | 3057                       | 2799                     | 245                    | 254                           | 94                          | 2812                      | 27,074                                      | 12.48                                       | 4.44                                    | 1.58                                          | 12.23 | 7.75  |
| 10    | 8      | 63  | F <sub>TH1</sub>         | 369                        | 382                      | 336                    | 339                        | 85                       | 33                     | 0.506                      | 1.10                     | 0.04                   | 2715                       | 2636                     | 237                    | 242                           | 73                          | 2478                      | 32,795                                      | 11.46                                       | 4.01                                    | 1.11                                          | 11.64 | 10.46 |
| 11    | 8      | 65  | U <sub>NC45A</sub>       | 578                        | 578                      | 280                    | 289                        | 83                       | 298                    | 3.482                      | 2.06                     | 1.59                   | 2909                       | 2535                     | 246                    | 251                           | 78                          | 2663                      | 29,282                                      | 11.83                                       | 4.17                                    | 2.02                                          | 11.74 | 5.81  |
| 10    | 19     | 65  | L <sub>GALSL</sub>       | 368                        | 381                      | 313                    | 315                        | 84                       | 55                     | 0.786                      | 1.18                     | 0.16                   | 3271                       | 3020                     | 250                    | 257                           | 78                          | 3021                      | 35,423                                      | 13.08                                       | 4.70                                    | 1.18                                          | 13.18 | 11.17 |
| 13    | 10     | 9   | S <sub>ECLM3</sub>       | 425                        | 432                      | 361                    | 368                        | 91                       | 64                     | 0.703                      | 1.18                     | 0.17                   | 2432                       | 2198                     | 256                    | 263                           | 81                          | 2176                      | 23,889                                      | 9.50                                        | 3.18                                    | 1.15                                          | 9.64  | 8.40  |
| 12    | 20     | 75  | G <sub>BP2</sub>         | 389                        | 395                      | 326                    | 327                        | 85                       | 63                     | 0.8                        | 1.19                     | 0.19                   | 2348                       | 2266                     | 204                    | 218                           | 88                          | 2144                      | 23,273                                      | 11.51                                       | 4.03                                    | 1.22                                          | 11.43 | 9.36  |
| 11    | 12     | 73  | P <sub>RKAR2B</sub>      | 345                        | 355                      | 287                    | 307                        | 182                      | 58                     | 0.264                      | 1.20                     | 0.21                   | 3502                       | 3276                     | 249                    | 257                           | 79                          | 3253                      | 38,215                                      | 14.06                                       | 5.11                                    | 1.24                                          | 14.06 | 11.31 |
| 10    | 2      | 73  | S <sub>H3D19</sub>       | 412                        | 424                      | 346                    | 350                        | 92                       | 66                     | 0.804                      | 1.19                     | 0.19                   | 5773                       | 4897                     | 255                    | 259                           | 76                          | 5518                      | 61,026                                      | 22.64                                       | 8.75                                    | 1.22                                          | 22.32 | 18.34 |
| 11    | 3      | 77  | S <sub>PP1</sub>         | 760                        | 722                      | 296                    | 301                        | 83                       | 464                    | 5.072                      | 2.57                     | 2.40                   | 2339                       | 2185                     | 249                    | 258                           | 80                          | 2090                      | 24,088                                      | 9.39                                        | 3.14                                    | 2.58                                          | 9.30  | 3.60  |
| 11    | 27     | 73  | K <sub>I2</sub>          | 497                        | 521                      | 300                    | 313                        | 172                      | 197                    | 1.209                      | 1.66                     | 0.94                   | 3298                       | 3151                     | 236                    | 241                           | 74                          | 3062                      | 38,324                                      | 13.97                                       | 5.08                                    | 1.63                                          | 13.92 | 8.53  |
| 14    | 14     | 77  | G <sub>GA3</sub>         | 503                        | 512                      | 348                    | 351                        | 89                       | 155                    | 1.809                      | 1.45                     | 0.60                   | 3943                       | 3502                     | 287                    | 293                           | 98                          | 3656                      | 32,745                                      | 13.74                                       | 4.98                                    | 1.44                                          | 13.69 | 9.52  |
| 15    | 21     | 17  | F <sub>AM71E2</sub>      | 329                        | 334                      | 295                    | 298                        | 80                       | 34                     | 0.45                       | 1.12                     | 0.07                   | 2431                       | 2229                     | 256                    | 267                           | 117                         | 2175                      | 16,769                                      | 9.50                                        | 3.18                                    | 1.12                                          | 9.43  | 8.40  |
| 11    | 27     | 35  | A <sub>LDH9A1_frag</sub> | 373                        | 388                      | 290                    | 298                        | 92                       | 83                     | 0.978                      | 1.29                     | 0.34                   | 5605                       | 5244                     | 206                    | 212                           | 72                          | 5399                      | 69,889                                      | 27.21                                       | 10.69                                   | 1.28                                          | 26.49 | 20.67 |
| 13    | 27     | 75  | C <sub>DC6</sub>         | 440                        | 457                      | 357                    | 364                        | 94                       | 83                     | 0.989                      | 1.23                     | 0.26                   | 4363                       | 3751                     | 274                    | 280                           | 81                          | 4089                      | 42,852                                      | 15.92                                       | 5.90                                    | 1.22                                          | 15.61 | 12.78 |
| 11    | 16     | 73  | H <sub>DDC2</sub>        | 342                        | 345                      | 280                    | 285                        | 81                       | 62                     | 0.741                      | 1.22                     | 0.24                   | 2121                       | 2052                     | 243                    | 246                           | 73                          | 1878                      | 24,74                                       | 8.73                                        | 2.85                                    | 1.17                                          | 9.03  | 7.70  |
| 9     | 25     | 75  | N <sub>UDD1</sub>        | 470                        | 498                      | 345                    | 352                        | 94                       | 125                    | 1.553                      | 1.36                     | 0.46                   | 2285                       | 2063                     | 250                    | 254                           | 76                          | 2015                      | 23,803                                      | 9.06                                        | 2.99                                    | 1.36                                          | 9.13  | 6.73  |
| 10    | 19     | 75  | W <sub>ARS</sub>         | 455                        | 475                      | 313                    | 321                        | 84                       | 142                    | 1.833                      | 1.45                     | 0.61                   | 3895                       | 3615                     | 256                    | 262                           | 76                          | 3639                      | 44,118                                      | 15.21                                       | 5.60                                    | 1.49                                          | 15.56 | 10.42 |
| 12    | 30     | 73  | C <sub>NST</sub>         | 431                        | 437                      | 377                    | 411                        | 426                      | 54                     | 0.061                      | 1.14                     | 0.11                   | 1761                       | 1676                     | 192                    | 201                           | 71                          | 1569                      | 20,775                                      | 9.17                                        | 3.04                                    | 1.14                                          | 9.57  | 8.38  |
| 12    | 7      | 73  | N <sub>CALD</sub>        | 275                        | 275                      | 253                    | 257                        | 74                       | 22                     | 0.243                      | 1.09                     | 0.02                   | 2977                       | 2849                     | 220                    | 225                           | 72                          | 2757                      | 36,444                                      | 13.53                                       | 4.89                                    | 1.09                                          | 13.28 | 12.20 |
| 12    | 30     | 75  | S <sub>UCG2</sub>        | 698                        | 708                      | 385                    | 411                        | 382                      | 313                    | 0.777                      | 1.81                     | 1.19                   | 2079                       | 2040                     | 193                    | 200                           | 63                          | 1886                      | 29,206                                      | 10.77                                       | 3.72                                    | 1.79                                          | 10.77 | 6.01  |
| 10    | 23     | 79  | A <sub>LDH1A3</sub>      | 432                        | 449                      | 328                    | 331                        | 85                       | 104                    | 1.388                      | 1.32                     | 0.39                   | 4477                       | 4093                     | 255                    | 264                           | 80                          | 4222                      | 46,738                                      | 17.56                                       | 6.60                                    | 1.34                                          | 17.13 | 12.75 |
| 10    | 15     | 81  | D <sub>HFR</sub>         | 513                        | 526                      | 333                    | 338                        | 86                       | 180                    | 2.186                      | 1.54                     | 0.75                   | 3214                       | 2987                     | 253                    | 262                           | 76                          | 2961                      | 35,855                                      | 12.70                                       | 4.54                                    | 1.57                                          | 12.59 | 8.01  |
| 11    | 26     | 83  | F <sub>RO21</sub>        | 386                        | 385                      | 264                    | 268                        | 75                       | 122                    | 1.56                       | 1.46                     | 0.62                   | 2397                       | 2258                     | 243                    | 249                           | 74                          | 2154                      | 27,149                                      | 9.86                                        | 3.33                                    | 1.42                                          | 9.67  | 6.82  |
| 13    | 23     | 69  | E <sub>CE2</sub>         | 388                        | 393                      | 362                    | 370                        | 91                       | 26                     | 0.253                      | 1.07                     | 0.00                   | 3802                       | 3455                     | 267                    | 273                           | 81                          | 3535                      | 39,037                                      | 14.24                                       | 5.19                                    | 1.08                                          | 14.15 | 13.07 |
| 11    | 8      | 81  | H <sub>OPX</sub>         | 321                        | 325                      | 311                    | 314                        | 82                       | 10                     | 0.134                      | 1.03                     | -0.07                  | 2640                       | 2332                     | 255                    | 260                           | 78                          | 2385                      | 26,564                                      | 10.35                                       | 3.54                                    | 1.05                                          | 10.27 | 9.82  |
| 11    | 29     | 81  | P <sub>GI1</sub>         | 260                        | 268                      | 248                    | 252                        | 73                       | 12                     | 0.219                      | 1.05                     | -0.04                  | 2340                       | 2090                     | 245                    | 287                           | 178                         | 2095                      | 10,129                                      | 9.55                                        | 3.20                                    | 1.07                                          | 9.40  | 8.76  |
| 12    | 11     | 79  | S <sub>HCBPL</sub>       | 419                        | 447                      | 256                    | 261                        | 75                       | 163                    | 2.48                       | 1.64                     | 0.91                   | 2210                       | 2316                     | 218                    | 223                           | 70                          | 1992                      | 29.9                                        | 10.14                                       | 3.45                                    | 1.64                                          | 10.39 | 6.33  |
| 16    | 19     | 77  | V <sub>ATI</sub>         | 317                        | 319                      | 256                    | 266                        | 109                      | 61                     | 0.486                      | 1.24                     | 0.26                   | 2814                       | 2760                     | 232                    | 240                           | 85                          | 2582                      | 29,647                                      | 12.13                                       | 4.29                                    | 1.22                                          | 12.22 | 10.05 |
| 16    | 17     | 35  | C <sub>ASK</sub>         | 380                        | 392                      | 237                    | 245                        | 73                       | 143                    | 2.014                      | 1.60                     | 0.85                   | 2337                       | 2274                     | 226                    | 237                           | 103                         | 2111                      | 19,777                                      | 10.34                                       | 3.54                                    | 1.63                                          | 10.11 | 6.19  |
| 15    | 11     | 73  | T <sub>ACCI</sub>        | 404                        | 409                      | 295                    | 302                        | 86                       | 109                    | 1.244                      | 1.37                     | 0.48                   | 3146                       | 2786                     | 260                    | 266                           | 80                          | 2886                      | 31.5                                        | 12.10                                       | 4.28                                    | 1.31                                          | 12.06 | 9.22  |



**Supplementary Table 3. Continued**

| Block | Column | Row | Name              | F635<br>Median_<br>D-Biotin | F635<br>Mean_<br>D-Biotin | B635<br>Median_<br>D-Biotin | B635<br>Mean_<br>D-Biotin | B635 SD_<br>D-Biotin | F635<br>Median_<br>-B635<br>Median_<br>D-Biotin | SNR<br>D-Biotin | I_<br>D-Biotin | Z_<br>Score_<br>D-Biotin | F635<br>Median_<br>Ursolic-<br>Bio | F635<br>Mean_<br>Ursolic-<br>Bio | B635<br>Median_<br>Ursolic-<br>Bio | B635<br>Mean_<br>Ursolic-<br>Bio | B635 SD_<br>Ursolic-<br>Bio | F635<br>Median_<br>-B635<br>Median_<br>Ursolic-Bio | SNR    | I_<br>Ursolic-<br>Bio | Z_<br>Score_<br>Ursolic-<br>Bio | I<br>Mean_<br>Ursolic-<br>Bio | I<br>Mean_<br>D-Biotin |
|-------|--------|-----|-------------------|-----------------------------|---------------------------|-----------------------------|---------------------------|----------------------|-------------------------------------------------|-----------------|----------------|--------------------------|------------------------------------|----------------------------------|------------------------------------|----------------------------------|-----------------------------|----------------------------------------------------|--------|-----------------------|---------------------------------|-------------------------------|------------------------|-------------------------------|------------------------|-------------------------------|------------------------|-------------------------------|------------------------|-------------------------------|------------------------|
| 15    | 22     | 47  | SH8P1             | 344                         | 355                       | 292                         | 296                       | 84                   | 52                                              | 0.702           | 1.18           | 0.17                     | 3440                               | 3098                             | 266                                | 275                              | 90                          | 3174                                               | 31.367 | 12.93                 | 4.64                            | 1.19                          | 13.33                  | 11.16                         |                        |                               |                        |                               |                        |                               |                        |
| 13    | 22     | 47  | SULT2A1           | 416                         | 422                       | 362                         | 368                       | 92                   | 54                                              | 0.587           | 1.15           | 0.12                     | 4201                               | 3453                             | 273                                | 284                              | 110                         | 3928                                               | 28.809 | 15.39                 | 5.68                            | 1.15                          | 15.14                  | 13.19                         |                        |                               |                        |                               |                        |                               |                        |
| 13    | 4      | 43  | API5              | 425                         | 427                       | 392                         | 401                       | 97                   | 33                                              | 0.268           | 1.08           | 0.02                     | 2464                               | 2310                             | 263                                | 270                              | 79                          | 2201                                               | 25.823 | 9.37                  | 3.12                            | 1.08                          | 9.31                   | 8.60                          |                        |                               |                        |                               |                        |                               |                        |
| 13    | 11     | 43  | CYP2J2            | 458                         | 470                       | 393                         | 398                       | 93                   | 65                                              | 0.774           | 1.17           | 0.15                     | 2693                               | 2743                             | 261                                | 267                              | 80                          | 2432                                               | 30.95  | 10.32                 | 3.53                            | 1.18                          | 10.44                  | 8.88                          |                        |                               |                        |                               |                        |                               |                        |
| 15    | 16     | 45  | DOK2              | 394                         | 408                       | 293                         | 297                       | 84                   | 101                                             | 1.321           | 1.34           | 0.44                     | 2272                               | 2361                             | 248                                | 256                              | 80                          | 2024                                               | 26.313 | 9.16                  | 3.04                            | 1.36                          | 9.16                   | 6.72                          |                        |                               |                        |                               |                        |                               |                        |
| 13    | 25     | 43  | FLAD1             | 391                         | 406                       | 351                         | 357                       | 87                   | 40                                              | 0.563           | 1.11           | 0.06                     | 4284                               | 3833                             | 269                                | 277                              | 83                          | 4015                                               | 42.843 | 15.93                 | 5.90                            | 1.12                          | 15.66                  | 14.02                         |                        |                               |                        |                               |                        |                               |                        |
| 15    | 19     | 43  | KCNK1             | 363                         | 367                       | 294                         | 300                       | 84                   | 69                                              | 0.798           | 1.23           | 0.26                     | 2286                               | 2442                             | 245                                | 251                              | 75                          | 2041                                               | 29.213 | 9.33                  | 3.11                            | 1.24                          | 9.22                   | 7.45                          |                        |                               |                        |                               |                        |                               |                        |
| 15    | 19     | 45  | ME3               | 389                         | 391                       | 282                         | 287                       | 82                   | 107                                             | 1.268           | 1.38           | 0.49                     | 5107                               | 4848                             | 279                                | 294                              | 104                         | 4828                                               | 43.788 | 18.30                 | 6.91                            | 1.34                          | 19.31                  | 14.41                         |                        |                               |                        |                               |                        |                               |                        |
| 13    | 16     | 45  | NG8               | 375                         | 393                       | 376                         | 382                       | 97                   | -1                                              | 0.113           | 1.00           | -0.12                    | 2625                               | 2413                             | 276                                | 283                              | 85                          | 2349                                               | 25.059 | 9.51                  | 3.19                            | 1.01                          | 9.36                   | 9.30                          |                        |                               |                        |                               |                        |                               |                        |
| 13    | 24     | 43  | OXR1              | 420                         | 436                       | 352                         | 358                       | 89                   | 68                                              | 0.876           | 1.19           | 0.19                     | 4124                               | 3691                             | 277                                | 282                              | 82                          | 3847                                               | 41.573 | 14.89                 | 5.46                            | 1.19                          | 14.81                  | 12.39                         |                        |                               |                        |                               |                        |                               |                        |
| 16    | 11     | 47  | PACSIN3           | 252                         | 258                       | 240                         | 243                       | 72                   | 12                                              | 0.208           | 1.05           | -0.04                    | 2116                               | 1964                             | 229                                | 233                              | 72                          | 1887                                               | 24.042 | 9.24                  | 3.07                            | 1.06                          | 9.24                   | 8.70                          |                        |                               |                        |                               |                        |                               |                        |
| 14    | 16     | 45  | RAB31             | 400                         | 406                       | 337                         | 343                       | 89                   | 63                                              | 0.708           | 1.19           | 0.18                     | 4015                               | 3728                             | 272                                | 280                              | 81                          | 3743                                               | 42.568 | 14.76                 | 5.41                            | 1.18                          | 14.95                  | 12.62                         |                        |                               |                        |                               |                        |                               |                        |
| 14    | 19     | 47  | TCPI              | 445                         | 462                       | 323                         | 332                       | 88                   | 122                                             | 1.477           | 1.38           | 0.49                     | 5751                               | 5539                             | 268                                | 275                              | 85                          | 5483                                               | 61.929 | 21.46                 | 8.25                            | 1.41                          | 21.54                  | 15.25                         |                        |                               |                        |                               |                        |                               |                        |
| 16    | 1      | 47  | XAGE2             | 320                         | 343                       | 268                         | 273                       | 77                   | 52                                              | 0.909           | 1.19           | 0.19                     | 4622                               | 3932                             | 247                                | 254                              | 78                          | 4375                                               | 47.154 | 18.71                 | 7.08                            | 1.20                          | 18.07                  | 15.08                         |                        |                               |                        |                               |                        |                               |                        |
| 16    | 13     | 47  | BASP1             | 297                         | 308                       | 235                         | 239                       | 71                   | 62                                              | 0.972           | 1.26           | 0.31                     | 3064                               | 2621                             | 239                                | 243                              | 75                          | 2825                                               | 31.707 | 12.82                 | 4.59                            | 1.28                          | 13.06                  | 10.20                         |                        |                               |                        |                               |                        |                               |                        |
| 15    | 7      | 43  | HSPA1A            | 572                         | 570                       | 306                         | 315                       | 86                   | 266                                             | 2.965           | 1.87           | 1.28                     | 3729                               | 3535                             | 272                                | 411                              | 479                         | 3457                                               | 6.522  | 13.71                 | 4.96                            | 1.86                          | 13.89                  | 7.49                          |                        |                               |                        |                               |                        |                               |                        |
| 16    | 18     | 47  | KI902540          | 423                         | 472                       | 225                         | 235                       | 75                   | 198                                             | 3.16            | 1.88           | 1.30                     | 7084                               | 7615                             | 236                                | 253                              | 125                         | 6848                                               | 58.896 | 30.02                 | 11.88                           | 1.94                          | 30.07                  | 15.50                         |                        |                               |                        |                               |                        |                               |                        |
| 14    | 31     | 45  | MOSPD2            | 405                         | 416                       | 313                         | 317                       | 83                   | 92                                              | 1.193           | 1.29           | 0.35                     | 5060                               | 4993                             | 277                                | 287                              | 92                          | 4783                                               | 51.152 | 18.27                 | 6.90                            | 1.27                          | 17.59                  | 13.89                         |                        |                               |                        |                               |                        |                               |                        |
| 15    | 31     | 45  | PUS3              | 288                         | 302                       | 264                         | 267                       | 77                   | 24                                              | 0.455           | 1.09           | 0.03                     | 2845                               | 2947                             | 236                                | 243                              | 75                          | 2609                                               | 36.053 | 12.06                 | 4.26                            | 1.10                          | 12.07                  | 10.99                         |                        |                               |                        |                               |                        |                               |                        |
| 15    | 30     | 45  | TEX11             | 319                         | 325                       | 262                         | 268                       | 77                   | 57                                              | 0.74            | 1.22           | 0.23                     | 2491                               | 2638                             | 246                                | 251                              | 84                          | 2245                                               | 28.417 | 10.13                 | 3.45                            | 1.19                          | 9.94                   | 8.32                          |                        |                               |                        |                               |                        |                               |                        |
| 16    | 1      | 87  | UBE2J1            | 397                         | 427                       | 274                         | 278                       | 76                   | 123                                             | 1.961           | 1.45           | 0.60                     | 2832                               | 2888                             | 249                                | 275                              | 466                         | 2583                                               | 5.607  | 11.37                 | 3.97                            | 1.47                          | 11.93                  | 8.14                          |                        |                               |                        |                               |                        |                               |                        |
| 16    | 7      | 47  | UBQLN3            | 304                         | 302                       | 252                         | 257                       | 76                   | 52                                              | 0.592           | 1.21           | 0.21                     | 3689                               | 3491                             | 246                                | 261                              | 96                          | 3443                                               | 33.646 | 15.00                 | 5.51                            | 1.21                          | 14.29                  | 11.84                         |                        |                               |                        |                               |                        |                               |                        |
| 14    | 30     | 45  | VCL               | 366                         | 366                       | 316                         | 319                       | 85                   | 50                                              | 0.553           | 1.16           | 0.14                     | 3440                               | 3443                             | 295                                | 564                              | 813                         | 3145                                               | 3.541  | 11.66                 | 4.10                            | 1.17                          | 12.05                  | 10.33                         |                        |                               |                        |                               |                        |                               |                        |
| 15    | 15     | 51  | MARKS             | 333                         | 336                       | 284                         | 290                       | 81                   | 49                                              | 0.568           | 1.17           | 0.16                     | 2966                               | 2765                             | 244                                | 253                              | 79                          | 2722                                               | 31.797 | 12.16                 | 4.31                            | 1.15                          | 12.05                  | 10.45                         |                        |                               |                        |                               |                        |                               |                        |
| 14    | 12     | 49  | TXND2C            | 483                         | 491                       | 330                         | 334                       | 89                   | 153                                             | 1.764           | 1.46           | 0.63                     | 3489                               | 3117                             | 272                                | 278                              | 80                          | 3217                                               | 35.488 | 12.83                 | 4.59                            | 1.45                          | 12.79                  | 8.79                          |                        |                               |                        |                               |                        |                               |                        |
| 15    | 24     | 53  | APIB1             | 413                         | 416                       | 290                         | 295                       | 82                   | 123                                             | 1.476           | 1.42           | 0.56                     | 4702                               | 3968                             | 262                                | 279                              | 108                         | 4440                                               | 34.157 | 17.95                 | 6.76                            | 1.42                          | 18.20                  | 12.77                         |                        |                               |                        |                               |                        |                               |                        |
| 16    | 4      | 49  | LINC0634_<br>frag | 287                         | 293                       | 253                         | 261                       | 78                   | 34                                              | 0.41            | 1.13           | 0.10                     | 2260                               | 2114                             | 236                                | 243                              | 75                          | 2024                                               | 24.947 | 9.58                  | 3.21                            | 1.10                          | 9.61                   | 8.73                          |                        |                               |                        |                               |                        |                               |                        |
| 16    | 6      | 53  | CCDC117           | 275                         | 294                       | 267                         | 271                       | 77                   | 8                                               | 0.299           | 1.03           | -0.07                    | 3037                               | 2799                             | 250                                | 263                              | 110                         | 2787                                               | 23.055 | 12.15                 | 4.30                            | 1.07                          | 10.95                  | 10.23                         |                        |                               |                        |                               |                        |                               |                        |
| 16    | 24     | 51  | CRYBB1            | 274                         | 383                       | 237                         | 247                       | 88                   | 37                                              | 1.545           | 1.16           | 0.13                     | 2838                               | 2577                             | 229                                | 235                              | 77                          | 2609                                               | 30.416 | 12.39                 | 4.41                            | 1.13                          | 12.16                  | 10.79                         |                        |                               |                        |                               |                        |                               |                        |
| 16    | 1      | 49  | MIOX              | 356                         | 372                       | 264                         | 268                       | 78                   | 92                                              | 1.333           | 1.35           | 0.44                     | 4932                               | 4406                             | 243                                | 250                              | 76                          | 4689                                               | 54.684 | 20.30                 | 7.76                            | 1.31                          | 20.07                  | 15.36                         |                        |                               |                        |                               |                        |                               |                        |
| 15    | 4      | 51  | RABL2A            | 474                         | 490                       | 302                         | 308                       | 86                   | 172                                             | 2.116           | 1.57           | 0.80                     | 3081                               | 3123                             | 252                                | 257                              | 78                          | 2829                                               | 36.744 | 12.23                 | 4.34                            | 1.56                          | 10.89                  | 7.00                          |                        |                               |                        |                               |                        |                               |                        |
| 16    | 1      | 51  | SEC14L4           | 296                         | 300                       | 261                         | 266                       | 74                   | 35                                              | 0.459           | 1.13           | 0.10                     | 4025                               | 3988                             | 243                                | 250                              | 79                          | 3782                                               | 47.316 | 16.56                 | 6.17                            | 1.17                          | 16.26                  | 13.92                         |                        |                               |                        |                               |                        |                               |                        |
| 16    | 16     | 53  | dM02G11.<br>C22.5 | 337                         | 339                       | 239                         | 247                       | 74                   | 98                                              | 1.243           | 1.41           | 0.54                     | 2009                               | 2025                             | 224                                | 229                              | 71                          | 1785                                               | 25.296 | 8.97                  | 2.96                            | 1.38                          | 8.92                   | 6.48                          |                        |                               |                        |                               |                        |                               |                        |
| 15    | 4      | 53  | SYNGR1            | 387                         | 393                       | 300                         | 303                       | 83                   | 87                                              | 1.084           | 1.29           | 0.35                     | 2465                               | 2615                             | 256                                | 270                              | 114                         | 2209                                               | 20.57  | 9.63                  | 3.24                            | 1.25                          | 9.87                   | 7.91                          |                        |                               |                        |                               |                        |                               |                        |
| 15    | 31     | 49  | ORPLA             | 362                         | 377                       | 274                         | 280                       | 79                   | 88                                              | 1.228           | 1.32           | 0.40                     | 3675                               | 3933                             | 258                                | 271                              | 99                          | 3417                                               | 36.99  | 14.24                 | 5.19                            | 1.38                          | 14.13                  | 10.21                         |                        |                               |                        |                               |                        |                               |                        |



Supplementary Table 3. Continued

| Block | Column | Row | Name     | F635  |         | B635  |         |
|-------|--------|-----|----------|-------|---------|-------|---------|-------|---------|-------|---------|-------|---------|-------|---------|-------|---------|-------|---------|-------|---------|-------|---------|-------|---------|-------|---------|-------|---------|-------|---------|-------|---------|-------|---------|-------|---------|-------|---------|-------|---------|-------|---------|-------|---------|-------|---------|
|       |        |     |          | Mean_ | Median_ |
| 19    | 11     | 15  | LRRFP1   | 488   | 503     | 437   | 440     | 103   | 51      | 0.612 | 1.12    | 0.07  | 3341    | 3701  | 265     | 271   | 85      | 3076  | 40.353  | 12.61 | 4.50    | 1.13  | 11.90   | 10.50 |         |       |         |       |         |       |         |       |         |       |         |       |         |       |         |       |         |       |         |       |         |       |         |
| 19    | 2      | 1   | ALDH1L2  | 395   | 418     | 322   | 327     | 85    | 73      | 1.071 | 1.23    | 0.25  | 2714    | 2856  | 259     | 263   | 77      | 2455  | 33.675  | 10.48 | 3.60    | 1.21  | 10.44   | 8.66  |         |       |         |       |         |       |         |       |         |       |         |       |         |       |         |       |         |       |         |       |         |       |         |
| 20    | 3      | 5   | PAK1     | 302   | 309     | 281   | 289     | 81    | 21      | 0.247 | 1.07    | 0.00  | 2100    | 2013  | 232     | 239   | 82      | 1868  | 21.634  | 9.05  | 2.99    | 1.08  | 8.84    | 8.19  |         |       |         |       |         |       |         |       |         |       |         |       |         |       |         |       |         |       |         |       |         |       |         |
| 18    | 6      | 5   | SYCE2    | 423   | 441     | 345   | 348     | 88    | 78      | 1.057 | 1.23    | 0.25  | 4140    | 3724  | 273     | 277   | 81      | 3867  | 42.556  | 15.16 | 5.58    | 1.25  | 14.93   | 11.92 |         |       |         |       |         |       |         |       |         |       |         |       |         |       |         |       |         |       |         |       |         |       |         |
| 18    | 24     | 1   | UBREX01  | 658   | 642     | 336   | 342     | 88    | 32      | 3.409 | 1.96    | 1.42  | 4345    | 3961  | 287     | 293   | 86      | 4058  | 42.651  | 15.14 | 5.57    | 2.00  | 15.54   | 7.79  |         |       |         |       |         |       |         |       |         |       |         |       |         |       |         |       |         |       |         |       |         |       |         |
| 20    | 28     | 5   | SRGAP3   | 420   | 436     | 398   | 407     | 142   | 22      | 0.204 | 1.06    | -0.03 | 2000    | 2014  | 215     | 223   | 87      | 1785  | 20.586  | 9.30  | 3.10    | 1.08  | 9.45    | 8.79  |         |       |         |       |         |       |         |       |         |       |         |       |         |       |         |       |         |       |         |       |         |       |         |
| 17    | 30     | 3   | HGN1     | 487   | 499     | 384   | 393     | 99    | 103     | 1.071 | 1.27    | 0.31  | 2444    | 2399  | 274     | 276   | 79      | 2170  | 26.873  | 8.92  | 2.93    | 1.31  | 8.89    | 6.81  |         |       |         |       |         |       |         |       |         |       |         |       |         |       |         |       |         |       |         |       |         |       |         |
| 19    | 17     | 11  | HSD17B14 | 322   | 330     | 291   | 298     | 82    | 31      | 0.39  | 1.11    | 0.05  | 2313    | 2373  | 257     | 280   | 159     | 2056  | 13.164  | 9.00  | 2.97    | 1.10  | 9.42    | 8.53  |         |       |         |       |         |       |         |       |         |       |         |       |         |       |         |       |         |       |         |       |         |       |         |
| 20    | 27     | 7   | SHC1     | 596   | 623     | 350   | 356     | 89    | 246     | 3     | 1.70    | 1.01  | 2111    | 2138  | 210     | 217   | 70      | 1901  | 27.443  | 10.05 | 3.41    | 1.68  | 9.87    | 5.86  |         |       |         |       |         |       |         |       |         |       |         |       |         |       |         |       |         |       |         |       |         |       |         |
| 19    | 8      | 11  | SCRN1    | 356   | 360     | 316   | 323     | 84    | 40      | 0.44  | 1.13    | 0.08  | 2674    | 2419  | 258     | 268   | 90      | 2416  | 23.9    | 10.36 | 3.55    | 1.11  | 10.42   | 9.39  |         |       |         |       |         |       |         |       |         |       |         |       |         |       |         |       |         |       |         |       |         |       |         |
| 20    | 6      | 11  | CIB3     | 402   | 413     | 270   | 280     | 85    | 132     | 1.565 | 1.49    | 0.67  | 3320    | 3382  | 238     | 242   | 71      | 3082  | 44.225  | 13.95 | 5.07    | 1.41  | 13.67   | 9.70  |         |       |         |       |         |       |         |       |         |       |         |       |         |       |         |       |         |       |         |       |         |       |         |
| 13    | 28     | 87  | IARS     | 494   | 507     | 369   | 372     | 92    | 125     | 1.467 | 1.34    | 0.43  | 3308    | 3363  | 267     | 274   | 83      | 3041  | 37.217  | 12.39 | 4.41    | 1.33  | 12.08   | 9.07  |         |       |         |       |         |       |         |       |         |       |         |       |         |       |         |       |         |       |         |       |         |       |         |
| 15    | 21     | 61  | HECW2    | 384   | 399     | 297   | 303     | 81    | 87      | 1.185 | 1.29    | 0.35  | 3690    | 3205  | 246     | 252   | 89      | 3444  | 33.18   | 15.00 | 5.51    | 1.30  | 14.74   | 11.34 |         |       |         |       |         |       |         |       |         |       |         |       |         |       |         |       |         |       |         |       |         |       |         |
| 20    | 17     | 23  | RBM53    | 396   | 407     | 302   | 307     | 83    | 94      | 1.205 | 1.31    | 0.38  | 2725    | 2819  | 227     | 236   | 81      | 2498  | 31.889  | 12.00 | 4.24    | 1.28  | 11.99   | 9.35  |         |       |         |       |         |       |         |       |         |       |         |       |         |       |         |       |         |       |         |       |         |       |         |
| 20    | 31     | 19  | PDCD6IP  | 471   | 481     | 378   | 384     | 95    | 93      | 1.021 | 1.25    | 0.28  | 4321    | 3966  | 225     | 232   | 79      | 4096  | 47.266  | 19.20 | 7.29    | 1.21  | 18.89   | 15.60 |         |       |         |       |         |       |         |       |         |       |         |       |         |       |         |       |         |       |         |       |         |       |         |
| 19    | 2      | 27  | TPP2     | 406   | 416     | 352   | 357     | 89    | 54      | 0.663 | 1.15    | 0.13  | 5444    | 4880  | 295     | 304   | 101     | 5149  | 45.307  | 18.45 | 6.98    | 1.11  | 18.86   | 16.93 |         |       |         |       |         |       |         |       |         |       |         |       |         |       |         |       |         |       |         |       |         |       |         |
| 19    | 17     | 27  | INMT     | 321   | 333     | 320   | 330     | 101   | 1       | 0.03  | 1.00    | -0.11 | 2800    | 2752  | 266     | 274   | 84      | 2534  | 29.5    | 10.53 | 3.62    | 1.00  | 10.80   | 10.75 |         |       |         |       |         |       |         |       |         |       |         |       |         |       |         |       |         |       |         |       |         |       |         |
| 20    | 7      | 27  | HSPA14   | 325   | 335     | 285   | 293     | 83    | 40      | 0.506 | 1.14    | 0.11  | 3893    | 3639  | 238     | 246   | 74      | 3655  | 45.851  | 16.36 | 6.09    | 1.11  | 16.49   | 14.84 |         |       |         |       |         |       |         |       |         |       |         |       |         |       |         |       |         |       |         |       |         |       |         |
| 20    | 21     | 31  | YOD1     | 364   | 375     | 334   | 342     | 94    | 30      | 0.351 | 1.09    | 0.03  | 2891    | 2941  | 230     | 237   | 103     | 2661  | 26.252  | 12.57 | 4.48    | 1.10  | 12.71   | 11.60 |         |       |         |       |         |       |         |       |         |       |         |       |         |       |         |       |         |       |         |       |         |       |         |
| 17    | 10     | 31  | TH       | 504   | 504     | 406   | 412     | 96    | 98      | 0.958 | 1.24    | 0.27  | 2298    | 2283  | 246     | 254   | 78      | 2052  | 26.013  | 9.34  | 3.11    | 1.23  | 9.44    | 7.66  |         |       |         |       |         |       |         |       |         |       |         |       |         |       |         |       |         |       |         |       |         |       |         |
| 17    | 28     | 31  | ACOT12   | 490   | 502     | 421   | 427     | 99    | 69      | 0.758 | 1.16    | 0.15  | 3345    | 3301  | 276     | 282   | 81      | 3069  | 37.272  | 12.12 | 4.29    | 1.15  | 11.82   | 10.26 |         |       |         |       |         |       |         |       |         |       |         |       |         |       |         |       |         |       |         |       |         |       |         |
| 19    | 31     | 33  | APBA2    | 529   | 555     | 328   | 335     | 87    | 201     | 2.529 | 1.61    | 0.87  | 2414    | 2491  | 257     | 264   | 79      | 2157  | 28.19   | 9.39  | 3.14    | 1.61  | 9.34    | 5.82  |         |       |         |       |         |       |         |       |         |       |         |       |         |       |         |       |         |       |         |       |         |       |         |
| 18    | 30     | 35  | AIMTL    | 523   | 543     | 354   | 361     | 93    | 169     | 1.957 | 1.48    | 0.65  | 3399    | 3407  | 288     | 300   | 117     | 3111  | 26.556  | 11.80 | 4.16    | 1.44  | 11.84   | 8.20  |         |       |         |       |         |       |         |       |         |       |         |       |         |       |         |       |         |       |         |       |         |       |         |
